1 **Nonadditive gene expression is correlated with nonadditive phenotypic**  
2 **expression in interspecific triploid hybrids of willow (*Salix* spp.)**

3 Craig H. Carlson<sup>\*,1</sup>, Yongwook Choi<sup>†,2</sup>, Agnes P. Chan<sup>†,2</sup>, Christopher D. Town<sup>†</sup>, Lawrence B.  
4 Smart<sup>\*</sup>

5 **Author affiliations:**

6 <sup>\*</sup>Horticulture Section, School of Integrative Plant Science, Cornell University, Geneva, NY 14456

7 <sup>†</sup>Plant Genomics, J. Craig Venter Institute, Rockville, MD 20850

8 **Current affiliations:**

9 <sup>1</sup>Cereal Crops Research Unit, Edward T. Schafer Agricultural Research Center, USDA-ARS, Fargo,  
10 ND 58102

11 <sup>2</sup>The Translational Genomics Research Institute, Phoenix, AZ 85004

12

13

14 **Running title:** Heterosis in triploid hybrids of willow

15

16 **Keywords:** allele-specific expression, copy number variation, differential gene expression, heterosis,  
17 hybrid vigor, polyploidy, regulatory divergence, ridge regression

18

19 **Corresponding author:**

20 Lawrence B. Smart

21 School of Integrative Plant Science

22 Cornell University

23 630 West North St.

24 Geneva, NY 14456

25 Phone: 315-787-2490

26 E-mail: lbs33@cornell.edu

27

28 **Author contact information:**

29 CHC: craig.h.carlson@usda.gov (ORCID: 0000-0003-2050-5455)

30 YC: ychoi@tgen.org (ORCID: 0000-0003-2373-9580)

31 APC: achan@tgen.org (ORCID: 0000-0003-2373-9580)

32 CDT: cdtown@jcvl.org (ORCID: 0000-0003-4653-4262)

33 LBS: lbs33@cornell.edu (ORCID: 0000-0002-7812-7736)

34

35

36

## ABSTRACT

37 Many studies have highlighted the complex and diverse basis for heterosis in inbred crops. Despite  
38 the lack of a consensus model, it is vital that we turn our attention to understanding heterosis in  
39 undomesticated, heterozygous, and polyploid species, such as willow (*Salix* spp.). Shrub willow is a  
40 dedicated energy crop bred to be fast-growing and high yielding on marginal land without competing  
41 with food crops. A trend in willow breeding is the consistent pattern of heterosis in triploids  
42 produced from crosses between diploid and tetraploid species. Here, we test whether differentially  
43 expressed genes are associated with heterosis in triploid families derived from diploid *S. purpurea*,  
44 diploid *S. viminalis*, and tetraploid *S. miyabeana* parents. Three biological replicates of shoot tips  
45 from all family progeny and parents were collected after 12 weeks in the greenhouse and RNA  
46 extracted for RNA-Seq analysis. This study provides evidence that nonadditive patterns of gene  
47 expression are correlated with nonadditive phenotypic expression in interspecific triploid hybrids of  
48 willow. Expression-level dominance was most correlated with heterosis for biomass yield traits and  
49 was highly enriched for processes involved in starch and sucrose metabolism. In addition, there was a  
50 global dosage effect of parent alleles in triploid hybrids, with expression proportional to copy number  
51 variation. Importantly, differentially expressed genes between family parents were most predictive of  
52 heterosis for both field and greenhouse collected traits. Altogether, these data will be used to progress  
53 models of heterosis to complement the growing genomic resources available for the improvement of  
54 heterozygous perennial bioenergy crops.

55

## INTRODUCTION

56 The heritability of gene expression has been attributed to both local *cis*-regulatory elements and  
57 distant *trans*-regulatory factors in the cell. Variation in these gene regulators can play dramatic roles  
58 in the evolution of gene expression. *Cis*-regulatory variation is thought to account for evolutionarily

59 significant phenotypic differences, whereas *trans*-regulatory variation is thought to account more for  
60 adaptive differences (Wray 2007). For instance, *cis*-regulatory variation in promoter regions within-  
61 species should be minimal, compared to that among species. So, it is more likely that *trans*-effects  
62 should account for most of the regulatory variation in the intraspecific hybrid, and *cis*-effects in the  
63 interspecific hybrid (Wittkopp *et al.* 2008a). More simply, the greater phylogenetic distance between  
64 parents, the more likely it is that differential gene expression in the progeny will be due to gene  
65 localized polymorphism. However, it is uncertain whether nonadditive gene expression and  
66 regulatory divergence are more commonly observed in plants exhibiting hybrid vigor (heterosis).

67 Many studies on heterosis have focused on hybrids derived from crossing inbred parents (Guo *et al.*  
68 2004; Guo *et al.* 2006), few on those derived from outcrossing parents (Landry *et al.* 2005; Zhuang  
69 and Adams 2007), and even fewer on hybrids derived from outcrossing parents of different species or  
70 ploidy (Wittkopp and Kalay 2011). From early expression studies based on only a few dozen genes  
71 to recent research employing RNA-Seq, a common result in maize, wheat, and rice is that additive  
72 gene expression in hybrids makes up the greatest proportion of those differentially expressed  
73 between the parents (Guo *et al.* 2006; Stupar and Springer 2006; Stupar *et al.* 2008; Wei *et al.* 2009),  
74 yet genes with nonadditive expression display allele-specific expression (ASE) (Guo *et al.* 2004;  
75 Springer and Stupar 2007; Wei *et al.* 2009). This differential expression could be due to the presence  
76 of remote *trans*-factors, whereby a small number of key regulatory genes could play significant roles  
77 in heterosis (Ni *et al.* 2009; He *et al.* 2010; Goff 2011).

78 A major ongoing topic in heterosis research is *to what extent is nonadditive gene expression*  
79 *correlated with nonadditive phenotypic expression* (Birchler *et al.* 2007), and how this informs  
80 combining ability or response to hybridization in the F<sub>1</sub>. In most crop plants, heterosis has been  
81 observed in hybrids bred from inbred parents of contrasting genetic backgrounds (East 1936; Birchler  
82 *et al.* 2003). In maize, high numbers of low-frequency alleles near conserved *cis*-regulatory regions

83 in the genome have been thought to lead to gene misexpression and are implicated as having a  
84 deleterious impact on important component traits (Kremling *et al.* 2018). Dominance may help  
85 explain the phenomenon of heterosis in maize (McMullen *et al.* 2009), and there are efforts to purge  
86 these deleterious alleles from breeding material via targeted gene-editing technologies. Answers to  
87 questions regarding the genomic basis of heterosis are not only relevant in breeding and selection, but  
88 will contribute to our understanding of the evolution of dioecious plant species that regularly undergo  
89 interspecific hybridization and polyploidization events.

90 Willow (*Salix* spp.) is exceptionally diverse, with over 350 species characterized across most of the  
91 temperate range, and ploidy levels ranging from diploid to dodecaploid (Kuzovkina *et al.* 2008), so  
92 the genomic basis of heterosis is likely to be different from that of conventional crop plants.  
93 Interspecific hybridization has been a key component in shrub willow improvement, as F<sub>1</sub> hybrids  
94 often display heterosis for biomass yield (Kopp *et al.* 2001; Cameron *et al.* 2008; Serapiglia *et al.*  
95 2014a; Fabio *et al.* 2016), especially those derived from diploid and tetraploid parents (Smart and  
96 Cameron 2008; Serapiglia *et al.* 2014b; Carlson and Smart 2016). What is promising for the biomass  
97 production industry, is that these high-yielding triploids outperform foundational commercial  
98 cultivars for dry weight biomass yield and other biomass-related morphological and physiological  
99 traits (Fabio *et al.* 2017). While there is good evidence of heterosis in triploid hybrids of willow  
100 (Serapiglia *et al.* 2014a; Carlson and Smart 2021), the genomic basis of this phenomenon is not well-  
101 characterized.

102 To support breeding efforts, an Illumina-based reference genome assembly of female *S. purpurea*  
103 94006 was constructed using a F<sub>2</sub> map-guided approach to orient scaffolds into pseudomolecules  
104 (*Salix purpurea* v1.0, DOE-JGI, phytozome-next.jgi.doe.gov/). Recently, sex specific long-read  
105 genome assemblies of *S. purpurea* have been completed (*Salix purpurea* v5.1, *S. purpurea* ‘Fish  
106 Creek’ v.3.1, DOE-JGI, phytozome-next.jgi.doe.gov/). The genome size is an estimated 330 Mb and

107 contains approximately 35,125 protein-coding genes (57,462 transcripts), and has proven useful in  
108 read alignment, variant discovery, and candidate gene selection (Hyden *et al.*, 2021). There have  
109 been a handful of studies in shrub willow that focused on genetic mapping (Gunter *et al.* 2003; Berlin  
110 *et al.* 2010; Hanley and Karp 2016; Hällingback *et al.* 2016; Zhou *et al.* 2018; Carlson *et al.* 2019) of  
111 quantitative trait loci (QTL) associated with biomass yield traits to aid in marker-assisted selection  
112 (MAS), but most have been low-resolution. There have also been attempts at correlating cell wall  
113 biosynthesis genes with variation in biomass composition in *Salix* spp. (Serapiglia *et al.* 2012), as  
114 well as correlating sex dimorphism (Gouker *et al.* 2021) with gene expression and methylation  
115 patterns in F<sub>2</sub> *S. purpurea* (Hyden *et al.* 2021). Thus far, family-based ASE in *Salix* is restricted to a  
116 single study of F<sub>1</sub> and F<sub>2</sub> intraspecific *S. purpurea* (Carlson *et al.* 2017), where expression-level  
117 dominance comprised the greatest proportion of differentially expressed genes between the parents of  
118 both families. Overall, there were more genes with ASE in the F<sub>1</sub> compared to F<sub>2</sub>, but both families  
119 displayed greater levels of *cis*- than *trans*-regulatory divergent expression patterns. In high-yielding,  
120 triploid hybrids of bioenergy willow, the heritability of gene expression and its broad influence on  
121 modulating heterosis for biomass yield and other traits important for biomass production has not been  
122 characterized.

123 Using willow as a model for understanding heterosis in heterozygous polyploid perennials, the  
124 objectives of this study were to: 1) describe the inheritance and regulatory divergence patterns  
125 influencing gene expression within and among three interspecific hybrid triploid families, 2) test for  
126 dosage effects on parent alleles in triploid progeny, and 3) determine which genes and gene sets are  
127 most predictive of heterosis for biomass growth and wood chemical composition traits important for  
128 bioenergy production.

129

## MATERIALS AND METHODS

## 130 **Plant material and growing conditions**

131 Progeny individuals from three full-sib F<sub>1</sub> triploid families included in this study were derived from  
132 the interspecific crosses: *S. purpurea* 94006 × *S. miyabeana* 01-200-003 (Family 415), *S. viminalis*  
133 07-MGB-5027 × *S. miyabeana* 01-200-003 (Family 423), and *S. miyabeana* 01-200-006 × *S.*  
134 *viminalis* ‘Jorr’ (Family 430). Herein, we refer to parents of the F<sub>1</sub> families by their clone identifiers  
135 and discriminate the female and male parents as P1 and P2, respectively.

136 The field trial was established May 2014 at Cornell AgriTech (Geneva, NY). All parents and progeny  
137 were transplanted from nursery beds as stem cuttings (20 cm) in a randomized complete block design  
138 with four replicate blocks. The field perimeter was buffered using *S. purpurea* genotypes 94006 and  
139 ‘Fish Creek’ to avoid edge effects. Each plot consisted of three clones (within-row spacing: 0.4 m;  
140 between row spacing: 1.82 m), of which the middle plant was measured. The field trial was evaluated  
141 for three years.

142 Parent genotypes and randomly selected progeny were grown from stem cuttings (20 cm) in 12-L  
143 plastic pots with peat moss-based potting mix (Fafard, Agawam, MA) to evaluate growth traits under  
144 greenhouse conditions over the course of 12 weeks. Plot was defined as a single cutting planted in a  
145 pot, which were arranged in a randomized complete block design with four replicate blocks. Two  
146 blocks were located on benches in one greenhouse with the other two blocks in an adjacent  
147 greenhouse set for identical growing conditions. Supplemental greenhouse lighting was provided on  
148 a 14 hr day : 10 hr night regimen with maximum daytime temperature of 26° and a nighttime  
149 temperature of 18°. Beyond weekly applications of beneficial insects and mites for pest management,  
150 no pesticides were required, as there were no symptoms of biotic or abiotic stress on any plant  
151 material throughout the length of the study. Liquid fertilizer (Peter’s 15-16-17 Peat-Lite Special<sup>®</sup>,  
152 Scott’s, Marysville, OH) was applied weekly beginning four weeks after planting.

153 For more information on the experimental design and phenotypes recorded in the field and  
154 greenhouse trial, see Carlson and Smart (2021).



## 155 **Determination of ploidy level**

156 The relative DNA content ( $\text{pg } 2C^{-1}$ ) of family parents and progeny was determined by flow  
157 cytometry using young leaf material harvested from actively growing shoots in greenhouse  
158 conditions. Analysis of 50 mg of mature leaf tissue from parental genotypes and selected progeny  
159 was performed at the Flow Cytometry and Imaging Core Laboratory at Virginia Mason Research  
160 Center in Seattle, WA. A minimum of four replicates of all samples were independently assessed  
161 using the diploid female *S. purpurea* clone 94006 as an internal standard. Diploid parent clones from  
162 multiple runs were averaged and then divided by the  $2C$ -value of the check for that run. This factor  
163 was then multiplied by each sample value within the same run as the check. When a clone was  
164 analyzed more than once,  $2C$ -values were averaged.

## 165 **Sample preparation and sequencing**

166 A total of three biological replicate shoot tips (~1 cm) of all triploid progeny individuals, as well as  
167 their parents, were excised from the primary stem and immediately flash-frozen in liquid  $N_2$  in the  
168 greenhouse, then placed in  $-80^\circ$  storage. Shoot tips were defined as the shoot axis that is the most  
169 distal part of a shoot system, comprised of a shoot apical meristem and the youngest leaf primordia.  
170 For each sample, a single shoot tip was removed from  $-80^\circ$  storage, and ground to a fine powder  
171 (100-200 mg) prior to RNA isolation using the Spectrum<sup>TM</sup> Total Plant RNA Kit with DNase I  
172 digestion (Sigma, St. Louis, MO). The only modification to manufacturer's 'Protocol B' was that  
173 prior to the tissue lysis step, the 2-ME/lysate mixture was incubated at  $65^\circ$  for 5 min, otherwise, the  
174 manufacturers' procedures were followed. After elution, cold ethanol precipitations were performed  
175 by the addition of 10  $\mu\text{L}$  acetic acid and 280  $\mu\text{L}$  100% cold ethanol to 100  $\mu\text{L}$  eluate and placed in  
176  $-80^\circ$  for 3 h. Samples were centrifuged at  $17,000 \times g$  for 30 min at  $4^\circ$ , washed with 80% ethanol,  
177 then centrifuged at  $17,000 \times g$  for 20 min at  $4^\circ$ . After centrifugation, the supernatant was discarded,

178 and the pellet resuspended in ribonuclease-free 10 mM Tris-HCl. Quantification of RNA sample  
179 quality and concentration was performed using the Experion ‘StdSens’ kit (Bio-Rad Laboratories,  
180 Inc., Hercules, CA). Stranded RNA-Seq libraries were created and quantified by qPCR (2×76 bp or  
181 2×151 bp) and sequenced on an Illumina Hi-Seq 2500 at J. Craig Venter Institute. Library sizes  
182 ranged from 8.3 to 53 million reads.

### 183 **Read filtering, mapping, and variant discovery**

184 Low-coverage paired-end genomic DNA sequencing of the parents of the F<sub>1</sub> families was performed  
185 to validate variants from RNA-Seq data. Biallelic SNPs were used to quantify allele-specific  
186 expression (ASE) within and among triploid progeny individuals. Parent DNA libraries were  
187 sequenced (Illumina HiSeq 2500, 2×101 bp) and aligned to the *S. purpurea* v1 reference genome  
188 using BWA mem (Li and Durbin 2009). Subsequent BAM files were sorted, marked for duplicates,  
189 and indexed in Picard ([broadinstitute.github.io/picard](https://broadinstitute.github.io/picard)). Indel realignment and variant calling was  
190 performed using *HaplotypeCaller* (emit\_conf=10, call\_conf=30) in the Genome Analysis Toolkit  
191 (GATK) (DePristo *et al.* 2011). Using *BBDuk* in the BBTools program ([https://jgi.doe.gov/data-and-](https://jgi.doe.gov/data-and-tools/bbtools/)  
192 [tools/bbtools/](https://jgi.doe.gov/data-and-tools/bbtools/)), raw reads were evaluated for artifact sequences by kmer matching (kmer = 25),  
193 allowing 1 mismatch and detected artifact was trimmed from the 3' end of the reads. RNA spike-in  
194 reads, PhiX reads and reads containing any Ns were removed. Following quality trimming (phred =  
195 Q6), reads under the length threshold were removed ( $\geq 25$  bp or 1/3 original read length). BWA mem  
196 was used for alignment of interleaved RNA-Seq reads to the reference. SAMtools was used to filter  
197 (-Shb -F 4 -f 0x2 -q 30), sort, and index resulting sequence alignment files. Duplicate reads were  
198 flagged using *MarkDuplicates* in Picard and GATK was used to flag and realign indels with  
199 *RealignmentTargetCreator* (minReads = 20) and *IndelRealigner*.

### 200 **Gene expression inheritance classifications**

201 To categorize inheritance of gene expression in the hybrid, Negative Binomial (NB) exact tests were  
202 performed in edgeR (Robinson *et al.* 2010) in R (R Core Team 2021), at a False Discovery Rate  
203 (FDR) of 0.005, for only genes with a minimum counts-per-million (CPM)  $\geq 1$ . Prior to NB tests,  
204 dispersions were estimated using three biological replicates of each group to account for library-to-  
205 library variability. Tests for differential expression were for paired comparisons between 1) diploid  
206 and tetraploid parents ( $P_{2X}$  and  $P_{4X}$ ), 2) diploid parent and the triploid hybrid ( $P_{2X}$  and H), and 3)  
207 tetraploid parent and the triploid hybrid ( $P_{4X}$  and H). Gene expression inheritance classifications were  
208 based on  $\log_2$  fold-change  $> 1.2$  and  $q$ -value  $< 0.005$  resulting from exact tests between the parents  
209 and hybrid, according to Carlson *et al.* (2017).

## 210 **Regulatory divergence classifications**

211 To determine *cis*- and *trans*-effects on gene expression, separate binomial exact tests were performed  
212 using library-normalized read counts of diploid ( $P_{2X}$ ) and tetraploid ( $P_{4X}$ ) parent alleles in the parents  
213 ( $P_{2X}$  and  $P_{4X}$ ) and the  $F_1$  triploid progeny individual ( $H_{2X}$  and  $H_{4X}$ ) from the  $P_{2X} \times P_{4X}$  cross. For a  
214 two-sided binomial test, the null hypothesis is that the expected counts are in the same proportions as  
215 the library sizes, or that the binomial probability for the first library is  $n_1 / (n_1 + n_2)$ . To test the null  
216 of independence of rows ( $P_{2X}$  vs  $P_{4X}$  and  $H_{2X}$  vs  $H_{4X}$ ) and columns ( $P_{2X}$  vs  $H_{2X}$  and  $P_{4X}$  vs  $H_{4X}$ ),  
217 Fisher's exact test was performed on a  $2 \times 2$  matrix comprised of  $P_{2X}$  and  $P_{4X}$  and  $H_{2X}$  and  $H_{4X}$   
218 normalized read counts. For all tests, a fixed FDR was applied at a level of 0.005. Filtering  
219 parameters required  $\geq 20$  reads summed between the parents, and two alleles at a locus, such that  
220 each allele corresponds to either the diploid or tetraploid parent.

221 For each site, significant differences (FDR = 0.005) on the expression of parent alleles can occur  
222 either between the parents (P, binomial exact test), the hybrid (H, binomial exact test), or all (F,  
223 Fisher's exact test). Categories of regulatory functions considered *cis*-only, *trans*-only, *cis + trans*,

224 *cis* × *trans*, compensatory were assigned following previously described methods (Landry *et al.*  
225 2005; McManus *et al.* 2010). Conservation of expression was attributed to cases where no significant  
226 differences could be observed. Ambiguous cases were observed when only one of the three tests (P,  
227 H, or F, described above) were deemed significant. While ambiguous cases could somewhat be  
228 resolved by lowering the significance threshold (e.g., FDR = 0.05), approximately equal proportions  
229 of ambiguous assignments were observed across regulatory divergence classes and triploid  
230 individuals. However, parent-only (P)-ambiguous genes were more common than the other  
231 ambiguous cases, of which, F-ambiguous genes were the least frequent.

### 232 **Copy number variation**

233 Copy number variation (CNV) was analyzed on a chromosome-wide scale, using median  $\log_2(P_{2X} /$   
234  $P_{4X})$  difference of logs in the parents and the median percentage of reads attributable to the  $P_{2X}$  allele  
235 in the triploid hybrid (diploid %). Diploid % was calculated as  $H_{P_{2X}} / (H_{P_{2X}} + H_{P_{4X}}) \times 100$ , where  
236  $H_{P_{2X}}$  is a vector of library-normalized counts of the  $P_{2X}$  allele in the hybrid and  $H_{P_{4X}}$  is that of the  $P_{4X}$   
237 allele in the hybrid. The expected CN of each homeolog in the hybrid was either determined to be  
238 deficient, normal, or replete, depending on these two parameters (Figure S1). To avoid over-  
239 estimating CNV in triploids, binned coverage of paired-end Illumina DNA-Seq reads of the parents  
240 was compared to validate RNA-Seq results.

### 241 **Gene ontology analysis**

242 Gene ontology (GO) term enrichment was performed in agriGO (Du *et al.* 2010) using the subset of  
243 the *S. purpurea* v1 transcriptome (reference set) that passed filtering, prior to tests of differential  
244 expression. Only significant ontologies (FDR = 0.05) were reported. *Salix purpurea* gene models and  
245 associated GO-terms which were annotated as hypothetical proteins were inferred using the best-hit

246 (blastp e-value  $\leq 0.01$ ) to *Populus trichocarpa* (Phytozome v10.3) and *Arabidopsis thaliana*  
247 (TAIR10 and Araport11 annotations) proteomes.

## 248 **Gene-trait correlations and prediction of heterosis using selected and random gene sets**

249 Gene-trait correlations were performed for each family using scaled  $\log_2$  (CPM + 1) library-  
250 normalized gene expression values (File S1) and midparent heterosis values for field and greenhouse  
251 collected traits (File S2), which were calculated as the percent deviation of the  $F_1$  from the midparent  
252 value, as described in Carlson and Smart (2021). Ridge regression ( $\alpha = 0$ ) was used to predict  
253 midparent heterosis trait values with different gene sets using 10 replications of nested cross  
254 validation (tenfold inner and outer) with *cv.glmnet* in *glmnet* (Friedman *et al.* 2010). Gene sets were  
255 comprised of scaled  $\log_2$  (CPM + 1) library normalized expression values of: 1) 5,000 randomly  
256 sampled genes, 2) the top 5,000 most highly expressed genes, 3) 4,986 genes which were  
257 differentially expressed between at least one pair of family parents, and 4) 379 genes that were  
258 commonly differentially expressed between all three family parent pairs. Prediction accuracy was  
259 assessed via linear regression of mean predicted and observed values.

260

## **RESULTS**

### 261 **Transcriptome analysis**

262 After quality filtering and alignment of triploid  $F_1$  progeny and parent paired-end RNA-Seq reads to  
263 the *S. purpurea* v1 reference, the library sizes ranged from 10 to 56 million. Of the 105 libraries  
264 sequenced, there were two identified as outliers (13X-430-035, greenhouse plot 59, biological  
265 replicate 1; 12X-415-074, greenhouse plot 278, biological replicate 3) and removed prior to  
266 downstream statistical analyses. In a multi-dimensional scaling plot of normalized transcriptome-  
267 wide gene expression of all triploid  $F_1$  progeny individuals and their parents (Figure 1A), the first

268 dimension represents sample distances based on species pedigree ( $V_e = 27\%$ ), with individuals  
 269 containing *S. viminalis* in their background clustering to the right of the first dimension, *S.*  
 270 *miyabeana* in the center, and *S. purpurea* to the left, such that the *S. viminalis* parents (07-MBG-5027  
 271 and ‘Jorr’) and *S. purpurea* 94006 are at extremes, or most distantly related. While family 415 and  
 272 423 individuals share the common tetraploid *S. miyabeana* parent 01-200-003, the proximity of  
 273 family 423 and 430 clusters indicates that common parent species (*S. viminalis* and *S. miyabeana*) is  
 274 a more important factor contributing to transcriptome-wide distances. The second and third  
 275 dimensions further separate sample libraries by pedigree ( $V_e = 11\%$ ) and ploidy ( $V_e = 7\%$ ),  
 276 respectively (Figure 1C). For all three triploid families, the respective diploid and tetraploid parents  
 277 flank clusters of family individuals and are relatively equidistant from the offspring cluster centers.  
 278 Taking the first two dimensions into account, Euclidean distances approximated here implies  
 279 transcriptome-wide gene expression inheritance is mostly conserved or additive.

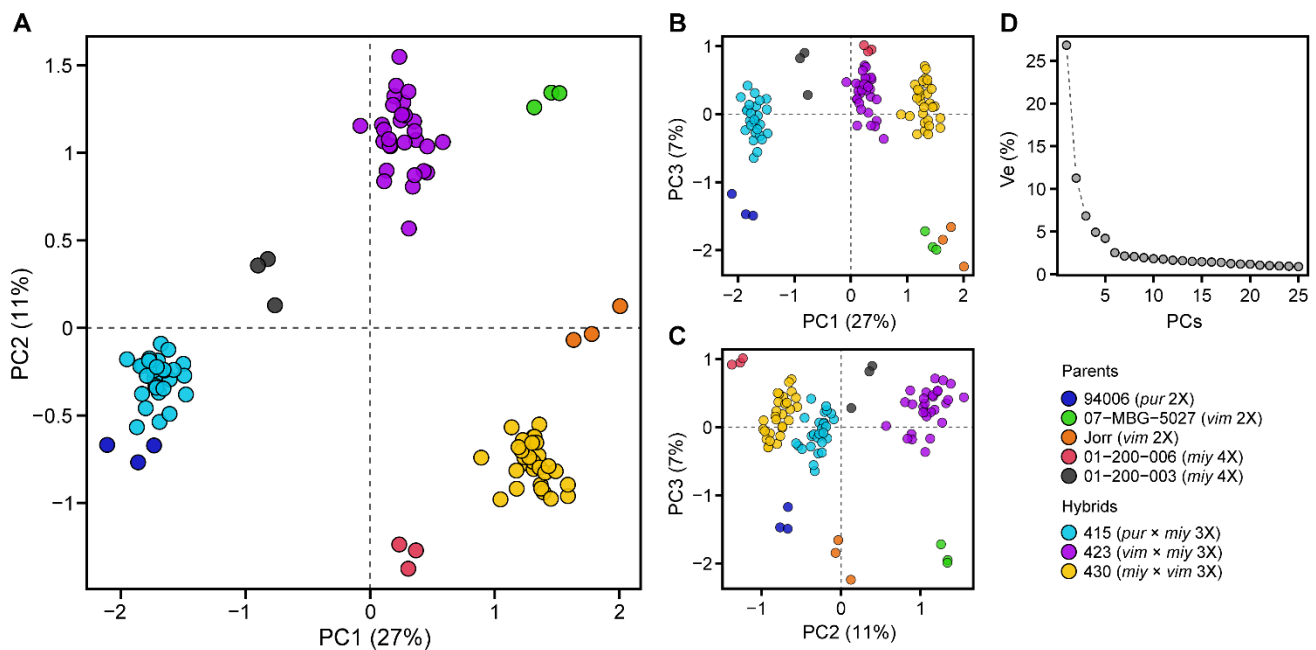

280

281 **Figure 1.** Multi-dimensional scaling plot of library-normalized transcriptome-wide gene expression of all  
 282 triploid  $F_1$  progeny individuals (families 415, 423, and 430) and their diploid (94006, 07-MBG-5027, and  
 283 ‘Jorr’) and tetraploid (01-200-006 and 01-200-003) parents. Panel (A) PC1 versus PC2, (B) PC1 versus PC3,  
 284 (C) PC2 versus PC3, and (D) percent variance explained (%  $V_e$ ) by the first 25 PCs. Euclidean distances on

285 the two-dimensional plot approximate leading  $\log_2$  fold-changes between samples, using the top 500 genes  
286 with the largest standard deviations. Parents and progeny libraries are colored according to the legend.

### 287 **Differential gene expression**

288 Exact tests (FDR = 0.005) of differential gene expression between triploid family parent genotypes  
289 yielded similar numbers of differentially expressed genes, but the P1:P2 ratios differed (Table 1). The  
290 comparison of family 415 parents, *S. purpurea* 94006 (P1) versus *S. miyabeana* 01-200-003 (P2), had  
291 5,166 differentially expressed genes, with 2,661 genes greater in 94006 and 2,505 genes greater in  
292 01-200-003 (P1:P2 = 1.06). The family 423 parents, *S. viminalis* 07-MBG-5027 (P1) versus *S.*  
293 *miyabeana* 01-200-003 (P2), had 5,523 differentially expressed genes, with 2,469 genes greater in  
294 07-MBG-5027 and 3,054 genes higher expressed in 01-200-003 (P1:P2 = 0.81). The family 430  
295 parent comparison, *S. miyabeana* 01-200-006 (P1) versus *S. viminalis* ‘Jorr’ (P2), yielded 5,155  
296 differentially expressed genes, with 2,467 genes greater in 01-200-006 and 2,688 genes greater in  
297 Jorr (P1:P2 = 0.91). Globally, the parents of family 423 had a greater percentage of genes that were  
298 differentially expressed (22.1%), compared to the parents of families 415 (20.8%) and 430 (20.5%).  
299 A total of 379 genes were differentially expressed in common among all three family parent duos.

300 For those genes differentially expressed between parents, inheritance patterns were determined based  
301 on both the parent expression values and those observed in the hybrids (Table 2). The percentage of  
302 differentially expressed genes showing nonadditive inheritance ranged from 27% to 39% (mean =  
303 33.5%) (Figure S2) in family 415, 40% to 56% (mean = 49.8%) in family 423, and 34% to 60%  
304 (mean = 50.3%) in family 430. Transgressively expressed genes (under- and overdominant) averaged  
305 just 0.7%, 1.1%, and 1.0%, for families 415, 423, and 430, respectively. The percentage of genes  
306 with underdominant expression out of total transgressively expressed genes was 98%, 74%, and 80%  
307 for families 423, 430, and 415, respectively. All individuals had a greater percentage of genes with



308 expression level dominance in the direction of the tetraploid parent, ranging from 66% to 88% and a  
309 mean of 70% across all triploid families.

310 There were fewer numbers of diploid parent dominant genes (15) (Table S1) than tetraploid parent  
311 dominant genes (89) (Table S2) that were common across all families and individuals. Due to the low  
312 number of common diploid parent dominant genes, there were no significant functional enrichments.  
313 Tetraploid dominant genes were enriched for GO molecular functions: beta-glucosidase activity and  
314 catalytic activity. In addition, tetraploid parent dominant genes were enriched for the KEGG  
315 pathways: phenylpropanoid biosynthesis, cyanoamino acid metabolism, biosynthesis of secondary  
316 metabolites, metabolic pathways, and starch and sucrose metabolism (Table S3).

### 317 **Allele-specific expression**

318 To determine the extent of regulatory divergent expression, tests for ASE were conducted using  
319 expression data on biallelic sites that were first called with parent DNA-Seq and RNA-Seq libraries  
320 prior to calling parent alleles in the progeny. Family averages for the total number of genes assigned  
321 to at least one regulatory class were 15,391 ( $\pm 114$ ), 16,800 ( $\pm 72$ ), and 16,711 ( $\pm 113$ ), for families  
322 415, 423, and 430, respectively (Table 3). On average, the percentage of genes assigned to non-  
323 conserved regulatory classes was 12%, 11%, and 10%, for families 415, 423, and 430, respectively  
324 (Figure S3). Family 415 had the greatest percentage of non-conserved genes with *cis*-regulation  
325 (65%), compared to families 423 (58%) and 430 (54%). The greatest mean percentage of genes with  
326 *trans* (24.6%), *cis*  $\times$  *trans* (7.4%), and compensatory (10.8%) regulatory divergence patterns was for  
327 family 430, whereas family 415 had the greatest mean *cis* + *trans* (5.1%). Across all triploid  
328 individuals, a total of 49 genes were in common, having either *cis*, *trans*, *cis* + *trans*, *cis*  $\times$  *trans*, or  
329 compensatory regulatory classifications (Table S4). In addition, higher proportions of overdominant  
330 and underdominant expression coincided with higher proportions of *cis*  $\times$  *trans* and compensatory



331 regulatory classes. Further, a higher proportion of *cis + trans* divergence coincided with a lower  
332 proportion of underdominant expression, most notably for the comparison of families 423 and 430  
333 with family 415.

### 334 **Gene activation and silencing**

335 The presence (CPM > 1) or absence (CPM = 0) of transcripts in the parent and triploid hybrid was  
336 compared for each family. Overall, more genes were silenced than activated in the triploid hybrids,  
337 especially for families 415 and 430, in which nearly five-times the number of genes were silenced  
338 than activated (Figure S4). Family 423 had a greater number of genes activated than the other two  
339 families, whereas family 430 had the greatest number of genes silenced. There were no GO-terms  
340 enriched for either activated or silenced gene-sets.

### 341 **Dosage effects on gene expression**

342 To test whether there was a dosage effect on parent alleles in triploid progeny, ASE ratios were  
343 compared within and among families. Only extreme deviations from expected dosage ratios ( $P =$   
344  $1 \times 10^{-5}$ ) were included in the analysis and considered to be dysregulated. Since it is expected that the  
345 triploid hybrid has inherited a single copy of the diploid parent allele and two copies of the tetraploid  
346 parent allele, if there was no deviation in expression of the parent alleles in the hybrid, all loci would  
347 be represented by a single point at the intersection of expected  $P_{2X} / P_{4X}$  difference of logs,  $\log_2(P_{2X} /$   
348  $P_{4X})$  (Figure 2).

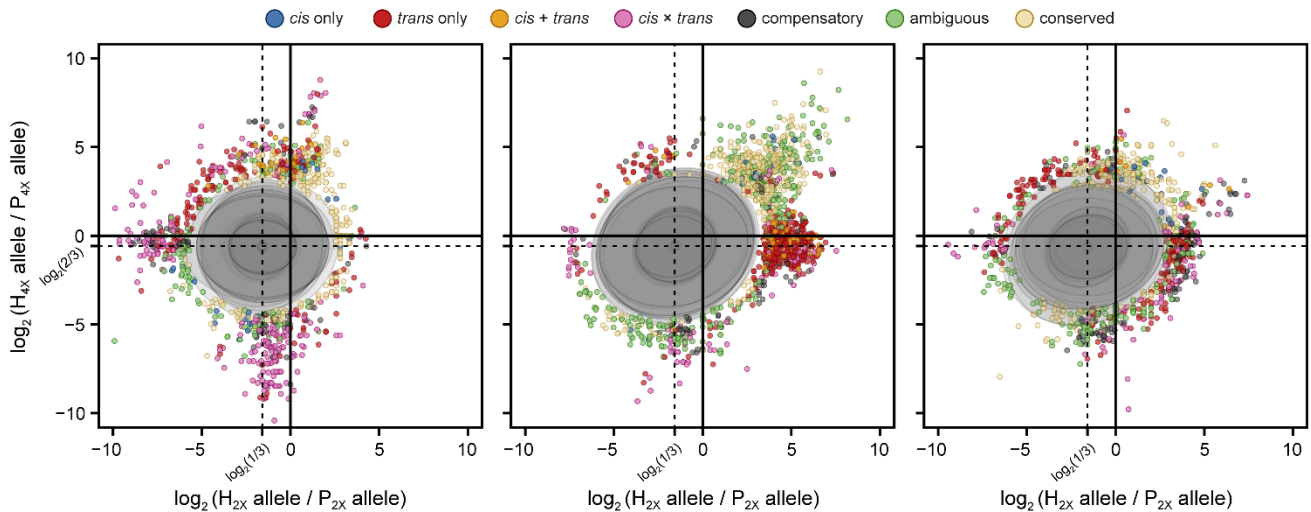

349

350 **Figure 2.** Superimposed dosage differential scatterplots of 10 individuals from each of the families 415, 423,  
 351 and 430 (left to right, respectively). Each point depicts the  $\log_2$  ratio of the diploid parent allele in the hybrid  
 352 and the diploid parent allele in the parent against the  $\log_2$  ratio of the tetraploid parent allele in the hybrid  
 353 and the tetraploid parent allele in the parent. Points are colored according to their regulatory assignment. Ellipses  
 354 mask most of the distribution of  $\log_2$  dosage ratios ( $Pr = 1 \times 10^{-5}$ ), such that points sitting outside ellipses are  
 355 extreme outliers from expected dosage. Dotted lines at  $\log_2(1/3) = -1.585$  and  $\log_2(2/3) = -0.585$  represent  
 356 distribution averages for diploid and tetraploid ratios, which is where the average distribution of dosage ratios  
 357 is expected to occur.

358 While the dosage ratios were comparable within in families, and all genome-wide family means fell  
 359 within expected ranges, there were significant departures from expected dosage. For dosage ratio  
 360 outliers, all three triploid families exhibited unique patterns. There was an abundance of genes  
 361 showing up- and down-regulation of the tetraploid parent allele in family 415, a majority of which  
 362 showed *cis*  $\times$  *trans* regulatory divergence. Family 423 outliers featured up-regulation of the diploid  
 363 parent allele in the hybrid, as well as high expression levels of both diploid and tetraploid parent  
 364 alleles in the hybrid (i.e., *trans*). Many outliers with greater diploid and tetraploid ASE in the hybrid  
 365 were classified ambiguous, and those ratios were not different for the tetraploid parent allele, but a  
 366 greater diploid ratio had either *trans* or *cis*  $\times$  *trans* regulatory patterns. All regulatory patterns were  
 367 represented in family 430, which had the greatest number of unique genes among the families that  
 368 had dosage ratio outliers from at least one individual. Unlike family 423, there were few genes with  
 369 greater expression for both diploid and tetraploid parents in family 430. In general, common dosage

370 dysregulated genes showed significant enrichment for response to stress, transcription, small  
371 molecule activity, and binding activity (Table S5).

372 Genes with the greatest mean expression coincided with greater gene expression variance. Those  
373 genes with a  $\mu/\sigma < 1$  ( $n = 338$ ) were significantly ( $q$ -value  $< 0.005$ ) enriched for: GO biological  
374 functions of photosynthesis, translation, and response to stimulus; GO molecular functions of  
375 structural molecule activity, structural constituent of the ribosome, tetrapyrrole binding, and  
376 chlorophyll binding; GO cellular components of chloroplast, cytoplasm, chloroplast thylakoid,  
377 photosystem, and apoplast; KEGG pathways of photosynthesis, photosynthesis - antenna proteins,  
378 ribosome, metabolic pathways, and flavonoid biosynthesis. Over 50% of the top 50 most variable  
379 genes are either class I chaperonin heat shock proteins or ribosomal complex subunits, with the latter  
380 being most prominent. On the converse, the most highly expressed but *least* variable genes were  
381 enriched for the GO molecular function of ADP binding, of which most are annotated as stress-  
382 associated or disease resistance proteins (e.g., receptor-like kinases) and pentatricopeptide repeat-  
383 containing proteins.

#### 384 **Chromosomal copy number variation**

385 The difference in  $\log_2 (P_{2X} / P_{4X})$  expression of parent alleles in the hybrid from respective diploid  
386 and tetraploid progenitors can help determine if major departures from expected dosage in the hybrid  
387 are a result of copy number variation (CNV) in the tetraploid parent. For instance, it is expected that  
388 triploids inherit one chromosome copy from the diploid parent, and two copies from the tetraploid  
389 parent, such that the difference of the hybrid  $\log_2 (P_{2X} / P_{4X})$  from the parent is equal to 1. Although  
390 these ratios are tetraploid parent informative, aneuploidy in the diploid parent cannot easily be  
391 determined, because at least one diploid parent copy must be present to infer chromosomal  
392 inheritance patterns in triploid progeny. Further, these ratios are not fully informative because any

393 copy number in the tetraploid parent (1/4, 2/4, 3/4, 4/4) can potentially exist in four observable cases  
394 in the triploid (4/3, 3/3, 2/3, 1/3). However, the percentage of reads attributable to the diploid parent  
395 in the triploid hybrid (i.e., percent diploid) can be utilized as a second parameter to rectify  
396 overlapping parent-hybrid ratios of different parent and hybrid combinations (Figure S1; Figure 3).  
397 While chromosome-wide  $\log_2 (P_{2X} / P_{4X})$  expression of the female diploid (*S. purpurea* 94006 and *S.*  
398 *viminalis* 07-MBG-5027) and male tetraploid (*S. miyabeana* 01-200-003) parents showed consistent  
399 median values approximately equal to 0, *Salix* chr09 significantly deviated from the expected  
400 (Wilcoxon  $p$ -value  $< 1 \times 10^{-16}$ ), with a  $\log_2 (P_{2X} / P_{4X})$  of 0.49. This suggests that only three copies of  
401 chr09 were present in *S. miyabeana* parent 01-200-003. This was the case for both families 415 and  
402 423, which share the male tetraploid parent 01-200-003. No significant deviations from the expected  
403 was observed for the parents of family 430 (*S. miyabeana* 01-200-006  $\times$  *S. viminalis* 'Jorr').

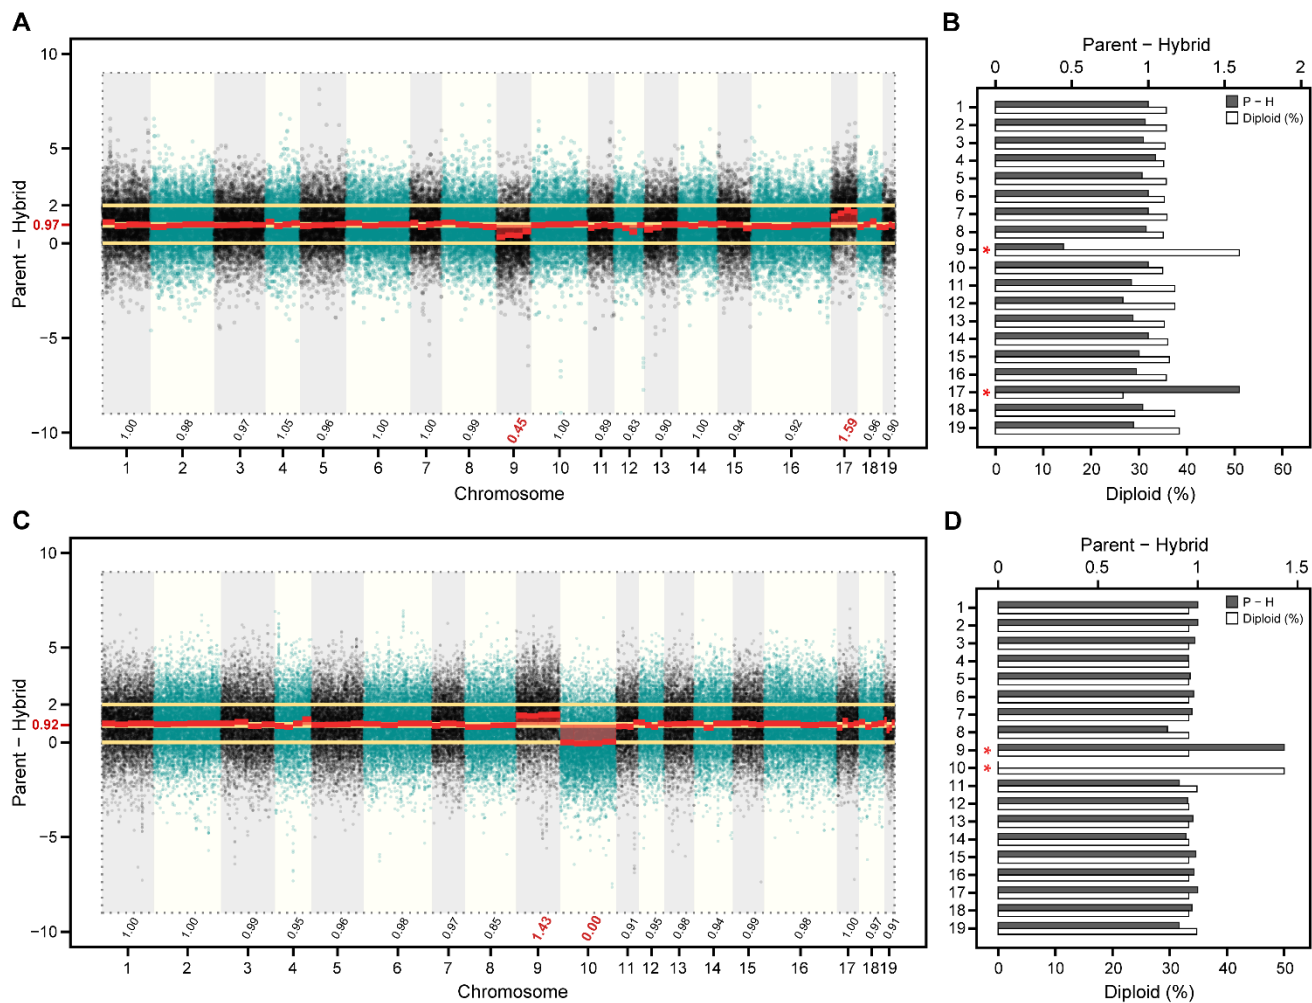

404

405 **Figure 3.** Manhattan plot (A) chromosome-wide differences of  $\log_2(P_{2X}/P_{4X})$  expression (parent – hybrid)  
 406 between the family 415 parents (female diploid 94006 and male tetraploid 01-200-003) and the triploid hybrid  
 407 12X-415-031. Median parent – hybrid values are shown above chromosome identifiers (x-axis). The barplot  
 408 (B) depicts the median parent – hybrid difference (dark grey bars, scale top x-axis) and the percent expression  
 409 in the hybrid attributable to the diploid parent allele (white bars, scale lower x-axis) by chromosome (y-axis).  
 410 The Manhattan plot in panel (C) and barplot in panel (D), represent the same analyses, but between the family  
 411 423 parents (female diploid 07-MBG-5027 and male tetraploid 01-200-003) and the triploid hybrid 12X-423-  
 412 070. Red text on x-axes in panels (A) and (D) correspond to red asterisks on y-axes in panels (B) and (C),  
 413 which denote significant differences (Wilcoxon  $p$ -value  $< 1 \times 10^{-16}$ ).

414 For family 415, five triploid individuals had a median  $\log_2(P_{2X}/P_{4X})$  parent – hybrid difference of  
 415 1.43 and approximately 34% of the reads which could be attributed to the diploid parent for chr09,  
 416 which is expected, given the male parent was limited to three chr09 copies. The other five individuals  
 417 had a  $\log_2(P_{2X}/P_{4X})$  difference of 0.45 for chr09 and were ~50% diploid over all loci for the  
 418 chromosome. Thus, the latter group in family 415 inherited two of the three tetraploid parent copies

419 of chr09 and the former inherited only one. A total of six individuals in family 423 had a  $\log_2 (P_{2X} /$   
420  $P_{4X})$  difference of 1.44 and were 33.3% diploid on average for chr09, which is expected if they  
421 inherited two copies from the tetraploid, because family 415 and 423 share the same male tetraploid  
422 *S. miyabeana* parent. The other four individuals in family 423 had a  $\log_2 (P_{2X} / P_{4X})$  difference of  
423 0.47 and were 50% diploid on average, so these individuals only inherited one of the three tetraploid  
424 parent copies of chr09.

425 It was not uncommon for individuals to possess an additional tetraploid copy of a chromosome and  
426 lack another. For instance, the family 415 individual, 12X-415-031, had a  $\log_2 (P_{2X} / P_{4X})$  difference  
427 of 1.59 for chr17, but only 25% diploid, which suggests that 12X-415-031 inherited an additional  
428 copy of the male tetraploid parent 01-200-003 chr17. Stunningly, the same individual also lacked one  
429 copy of the male chr09 ( $\log_2 (P_{2X} / P_{4X}) = 0.45$  and 50% diploid) (Figure 3A, Figure 3B). Another  
430 example was for the family 423 individual 12X-423-070 (Figure 3C, Figure 3D). While 12X-423-  
431 070 inherited two copies of chr09 from the tetraploid parent 01-200-003 ( $\log_2 (P_{2X} / P_{4X}) = 1.43$  and  
432 33.3% diploid), this individual lacked one copy of the tetraploid parent chr10 ( $\log_2 (P_{2X} / P_{4X}) = 0.0$   
433 and 50% diploid), which seems to be spurious, given there was no DNA-Seq or RNA-Seq coverage  
434 to indicate that 01-200-003 lacked a copy of chr10.

435 Unequal inheritance of chr09 in families 415 and 423 was unexpected, yet it permitted a test for  
436 genes insensitive to changes in dosage for this chromosome, as well as common genes up- or down-  
437 regulated in each group. Three individuals each from families 415 and 423 with a 33% diploid  
438 attribution and three each from both families with a 50% diploid attribution for chr09 were  
439 compared. Individuals with spurious tetraploid CN (e.g., 12X-415-031 and 12X-423-070) were not  
440 included in the analysis. As previously stated, there is a global dosage effect in triploids, irrespective  
441 of CN, but dosage sensitive genes, which are most likely to be misexpressed, should show consistent  
442 and directional fold-changes. To avoid any buffering effects from the diploid parent ( $P_{2X}$ ), allele-

443 specific expression of  $P_{4X}$  in the parent and hybrid were compared with a binomial exact test to reject  
444 the null hypothesis that the expression of  $P_{4X}$  allele in the triploid hybrid is half ( $Pr = 0.5$ ) that of  $P_{4X}$   
445 allele in the tetraploid parent.

#### 446 **Gene–trait correlations**

447 Since CNV in triploids may posit drastic phenotypic consequences, Pearson correlations ( $r$ ) were  
448 made for mean genome-wide diploid (%) and heterosis for important biomass-related growth traits  
449 collected in the field and greenhouse (Table S6). In general, diploid % was positively correlated with  
450 heterosis for foliar traits and inversely correlated with heterosis for biomass stem growth traits (Table  
451 4; Figure 4) described in Carlson and Smart (2021). Diploid % was positively correlated with the  
452 field-collected leaf growth traits (length, perimeter, ratio, specific leaf area) and inversely correlated  
453 with stem growth traits (height, basal diameter, area, volume). For greenhouse-collected traits,  
454 diploid % was positively correlated with specific leaf area only, but inversely correlated with biomass  
455 yield, stem growth traits, and vegetative phenology. Field and greenhouse collected traits most  
456 positively correlated with diploid % were crown form ( $r = 0.65$ ) and specific leaf area ( $r = 0.65$ ),  
457 respectively, and inversely were plot height ( $r = -0.82$ ) and root dry mass ( $r = -0.73$ ), respectively.  
458 The only foliar field trait with an inverse relationship with diploid % was leaf shape factor ( $r =$   
459  $-0.51$ ), which is a measure of leaf symmetry. Diploid % had a strong inverse relationship with the  
460 proportion of differentially expressed genes showing nonadditive inheritance ( $r = -0.71$ ).



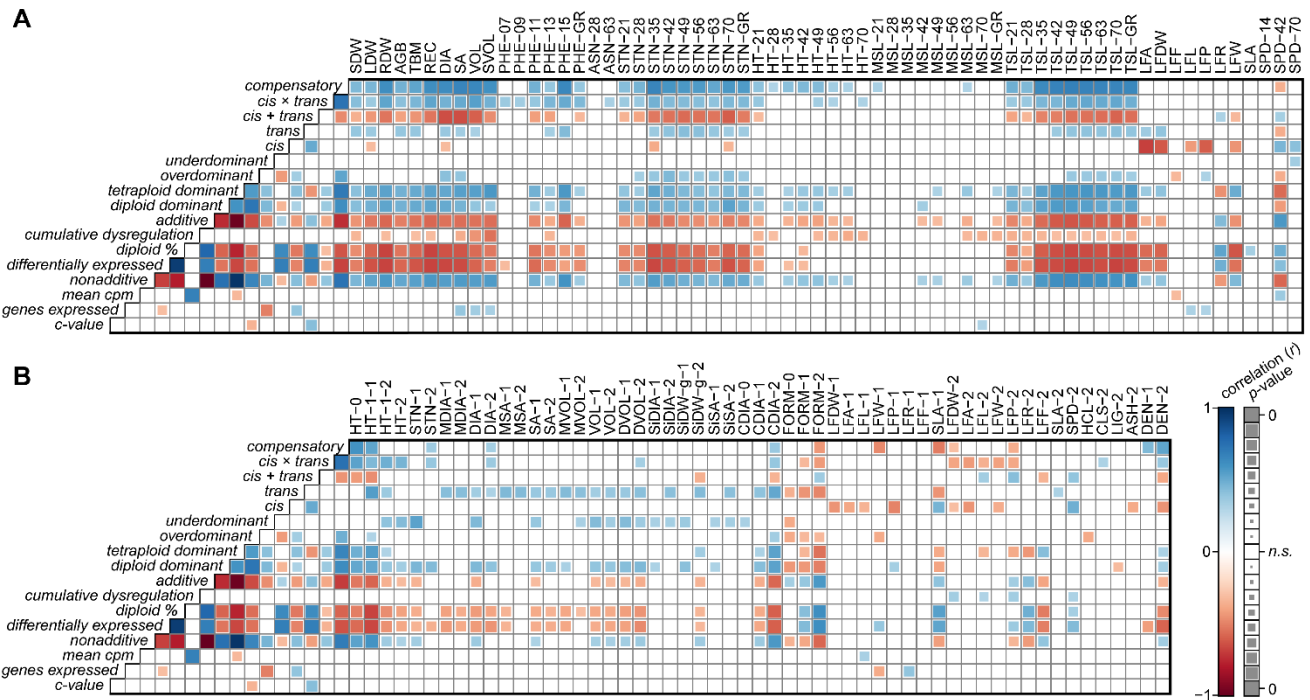

461

462 **Figure 4.** Correlations of nonadditive, regulatory divergent, and cumulative expression dysregulation with heterosis for (A) greenhouse and (B) field phenotypes. Pearson correlation coefficients ( $r$ ), positive  
 463 correlations are illustrated by filled blue squares and negative correlations by filled-red squares. Non-  
 464 significant correlations ( $p$ -value > 0.01) were left blank. Significance levels ( $p$ -values) were used to scale the  
 465 area of each square, such that smaller squares represent correlation coefficients with lower significance and  
 466 larger squares represent those with greater significance.  
 467

468 Overall, there were stronger associations in the greenhouse trial than the field trial. The proportions  
 469 of additive expression, and *cis*- and *cis + trans* divergence, were inversely correlated with heterosis  
 470 for nearly all biomass traits in the greenhouse trial, as well as the total proportion of differentially  
 471 expressed genes, cumulative expression dysregulation, and the proportion of differentially expressed  
 472 genes with additive expression inheritance. For both the field and greenhouse trials, *trans*-  
 473 divergence, differential expression, and the proportion of diploid- and tetraploid-parent dominant  
 474 genes were positively correlated with heterosis for total stem volume. Heterosis for hemicellulose  
 475 content was positively correlated with the proportion of *cis*-divergence and inversely with  
 476 overdominance. Heterosis for cellulose and lignin content were positively and inversely correlated  
 477 with the proportion of differentially expressed genes with diploid parent dominant expression.  
 478 Chlorophyll content (SPAD) in both trials was inversely correlated with the proportion of



479 nonadditive expression, *trans*, and compensatory regulatory divergence, and the proportion of  
480 differentially expressed genes with tetraploid parent dominant inheritance. *Cis*-divergence was  
481 positively correlated with the proportion of differentially expressed genes with additive inheritance,  
482 but inversely correlated with the proportion of diploid parent dominant and overdominant expression.  
483 The proportion of differentially expressed genes with *trans*-divergent expression was inversely  
484 correlated with the proportion of additive inheritance, but positively correlated with dominant and  
485 overdominant proportions. Finally, mean normalized expression levels (CPM) had the greatest  
486 positive association with cumulative dysregulation ( $r = 0.68$ ); however, nonadditive inheritance and  
487 regulatory proportions lacked any significant associations with cumulative dysregulation.

488 Genes most commonly associated with heterosis for biomass growth traits were a peripheral-type  
489 benzodiazepine receptor (PBR, SapurV1A.0155s0220;  $r = 0.64$  to  $0.81$ ) located on *Salix* chr02 and a  
490 squamosa promoter-binding-like protein (SPL10, SapurV1A.0056s0240;  $r = 0.67$  to  $0.73$ ) on chr03  
491 (File S3). Most common inverse gene associations with biomass growth traits were mediator of RNA  
492 polymerase II subunit 7 (MED7, SapurV1A.0616s0090;  $r = -0.74$  to  $-0.81$ ) on chr06 and a NLI  
493 interacting factor-like serine/threonine specific protein phosphatase (NIF, SapurV1A.0546s0050;  $r =$   
494  $-0.67$  to  $-0.78$ ) on chr15. Genes with a strong positive relationship with total biomass yield ( $r > 0.6$ ,  
495  $n = 189$ ) were enriched for GO molecular functions: catalytic activity, transferase activity, and  
496 acyltransferase activity, and those inversely associated ( $r < -0.6$ ,  $n = 94$ ) were enriched for GO  
497 molecular functions: structural molecule activity and structural constituent of the ribosome (Table  
498 S7).

#### 499 **Prediction of heterosis with random and selected gene expression sets**

500 For most traits, genes that were differentially expressed between the  $F_1$  parents were more predictive  
501 of midparent heterosis than those 5,000 genes either randomly sampled or most highly expressed

502 (Figure 5). Prediction accuracies of midparent heterosis using genes commonly differentially  
 503 expressed between all three family parent pairs ( $n = 379$ ) were akin to the larger set of genes  
 504 differentially expressed between at least one pair ( $n = 4,986$ ), yet there were cases in which one gene  
 505 set performed substantially better, vice versa.

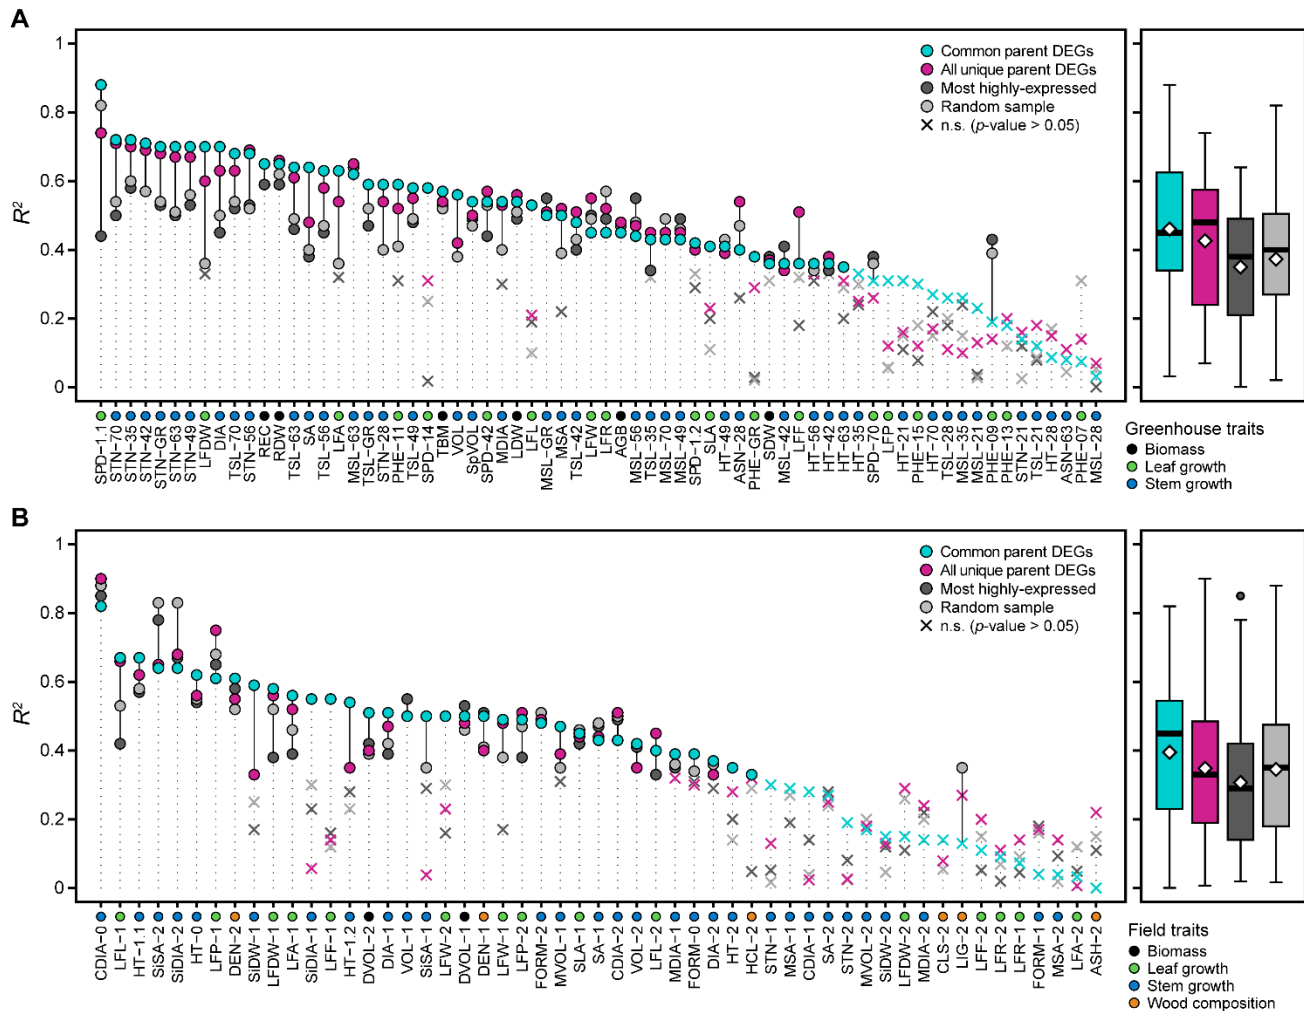

506

507 **Figure 5.** Prediction accuracies ( $R^2$ ) of heterosis values for (A) greenhouse and (B) field phenotypes using  
 508 selected and random gene expression sets. These four gene sets were: differentially expressed genes common  
 509 among parent pairs (cyan,  $n = 379$ ), differentially expressed genes in at least one parent pair (magenta,  $n =$   
 510  $4,978$ ), the most highly expressed genes (dark grey,  $n = 5,000$ ), and a random sampling of genes (light grey,  $n =$   
 511  $5,000$ ). Boxplots to the right of each panel depict the distribution of prediction accuracies, with means  
 512 represented as yellow diamond points. Traits are colored according to respective classes described in the lower  
 513 left legend of each panel.

514 Overall, mean prediction accuracies were greater for greenhouse traits (Figure 5A) than field traits

515 (Figure 5B), of which the common, overlapping differential expression gene set had better prediction

516 accuracies on average. This can partly be explained by more frequent repeated measurements  
517 recorded in the greenhouse and the impact of pest damage on field phenotypes not present in the  
518 greenhouse. In addition, lower  $R^2$  values were observed for second year post-coppice measurements  
519 in the field compared to those taken the first year following coppice. Across all four gene sets, basal  
520 crown diameter had the highest prediction accuracies ( $R^2 = 0.82 - 0.90$ ), followed by leaf perimeter,  
521 chlorophyll content, primary stem number, and basal stem diameter.

522

## DISCUSSION

### 523 **Differential gene expression is both additive and nonadditive**

524 Using microarrays of maize, Stupar and Springer (2006) determined that approximately 20% of the  
525 genes that were differentially expressed between inbred parents were nonadditively expressed in the  
526 hybrid, although very few were above the high parent (overdominant) or below the low parent  
527 (underdominant). Swanson and Wagner (2006) found all inheritance categories in the hybrid  
528 represented among differentially expressed genes between two inbred parents of maize. In our study,  
529 there were very few genes that were differentially expressed between diploid and tetraploid parents  
530 and were outside the parental range in the triploid hybrid, especially overdominant genes, which were  
531 three-times less-frequent on average than underdominant genes. In contrast, differentially expressed  
532 genes between heterozygous thistle (*C. arvensis*) parents were more frequently overdominant than  
533 underdominant in intraspecific hybrids (Bell *et al.* 2013). Expression-level dominance was most-  
534 prominent in both shoot tip and stem internode tissues of  $F_1$  and  $F_2$  diploid *S. purpurea* families  
535 (Carlson *et al.* 2017) and was primarily biased in the direction of the female parent, especially in  
536 shoot-tip tissues. Very little additive gene expression was observed in *S. purpurea*, which is a unique  
537 result, compared with model crop plants (Guo *et al.* 2006; Stupar and Springer 2006; Song *et al.*  
538 2013).

539 Among the triploid *Salix* families investigated in this study, expression-level dominance was  
540 prominent, as was established in diploid *S. purpurea*, but the percentage of differential expression  
541 attributed to dominance inheritance ranged from 28% to 60%. Progeny from reciprocal crosses  
542 between *Salix* Sections Vimen and Helix, showed the greatest percentage of dominant expression,  
543 which was 50% of those genes expressed differently between diploid and tetraploid parents. Cases of  
544 expression-level dominance in polyploid crops have been described in intraspecific thistle (Bell *et al.*  
545 2013), interspecific coffee (Combes *et al.* 2015), as well as in allotetraploids of both rice (Xu *et al.*  
546 2014) and *Arabidopsis* (Shi *et al.* 2012). This preferential expression is thought to be orchestrated by  
547 allelic interactions, which functions to silence one of the parent alleles in a parent-of-origin manner  
548 (Chen and Pikaard, 1997; Stupar *et al.* 2007; Donoghue *et al.* 2014; Baldauf *et al.* 2016).

549 Further analysis of allele-specific expression in triploid hybrids of willow indicated that gene  
550 expression variation was associated with both *cis*- and *trans*-regulatory divergence, and that *cis*-*trans*  
551 compensatory interactions accounted for up to 25% of the variation. Allele-specific expression has  
552 been extensively studied in model species, most notably, in interspecific hybrids and allopolyploids  
553 of *Arabidopsis* (Shi *et al.* 2012) and *Drosophila* (Landry *et al.* 2005; Wittkopp *et al.* 2008a; Wittkopp  
554 *et al.* 2008b; McManus *et al.* 2010). There is a general trend that *cis*-regulatory divergence accounts  
555 for a greater proportion of expression variation in interspecific hybrids and that *trans*-regulatory  
556 divergence is more frequent in intraspecific hybrids (Wittkopp *et al.* 2004). In hybrids of inbred  
557 maize, *cis*-acting variation accounted for most of the divergent expression between parents and was  
558 largely attributed to additive expression patterns (Stupar and Springer 2006). Greater sequence  
559 divergence was proposed to promote the flexibility of *trans*-factors in their binding to interacting  
560 factors and *cis*-elements in *Arabidopsis thaliana* and *A. arenosa* parent alleles (Shi *et al.* 2012).  
561 McManus *et al.* (2010) hypothesized that greater transgressive inheritance is associated with greater  
562 proportions of *cis* × *trans* divergence. Likewise, what was identified in triploid *Salix* hybrids, greater

563 proportions of overdominant and underdominant (transgressive) expression inheritance did coincide  
564 with greater proportions of *cis* × *trans* and compensatory regulatory classes. Further, a greater  
565 proportion of *cis* + *trans* divergence coincided with a lower proportion of underdominant expression.

### 566 **Global dosage balance with local sensitivities**

567 Dosage in all three triploid families appeared to behave in an extraordinarily additive manner,  
568 irrespective the number of parent copies inherited. However, a handful of genes did depart from  
569 expected dosage in triploids, most notably, those coding for heat shock proteins. In this study, genes  
570 annotated as coding for heat shock proteins displayed greater expression in individuals with normal  
571 chr09 copies, whereas those null for a tetraploid parent copy had greater expression of stress- or  
572 senescence-associated genes. Overall, there were greater proportions of loci showing *cis* × *trans* and  
573 compensatory regulatory patterns in family 415 and 423 individuals that were aneuploid with only  
574 one tetraploid parent copy (e.g., chromosomes 2, 9, 10, and 17), or a greater average diploid %.  
575 While the quantity of a translation product (protein subunit) may impact the assembly of a particular  
576 complex, the mere involvement in a complex can also impact protein stability (Veitia *et al.* 2007). It  
577 may be that null mutations in metabolic functions are tolerated in a heterozygous state, but only  
578 weak, loss-of-function, dosage-sensitive genes can survive negative selection as heterozygotes  
579 (Birchler and Veitia 2010). The balance of regulatory hierarchies (dosage balance) (Birchler *et al.*  
580 2005) are sensitive to gene dosage and changes in individual components can influence phenotype. In  
581 macromolecular complexes, dosage balance is essential, because partial aneuploidy of a dosage-  
582 sensitive gene can change the stoichiometry of the complexes and lead to fitness defects (Veitia *et al.*  
583 2008). In maize, greater proportions of nonadditive expression was observed in triploid and tetraploid  
584 hybrids with genome dosage effects (Guo *et al.* 1996; Auger *et al.* 2005; Birchler *et al.* 2005; Riddle  
585 *et al.* 2010).

586 Previous gene expression studies in inbred and outcrossing species have regularly pooled F<sub>1</sub> progeny  
587 libraries prior to sequencing. While this is not an issue for inbred crops, out results show that pooled  
588 RNA-Seq can underestimate factors contributing to the inheritance of gene expression in  
589 heterozygous species, especially for families derived from natural polyploids. For instance, without  
590 sequencing individual libraries, we would not have detected aneuploidy for chromosomes of  
591 polyploid progenitors in the F<sub>1</sub> based on pooled RNA-Seq data alone, which could distort  
592 assumptions about the evolution of gene expression inferred from inheritance and regulatory  
593 assignments. Even if the expected ploidy in the hybrid is based on chromosome counts or DNA-Seq  
594 of the parents, there may not be equal inheritance, and binomial tests for ASE between the parents  
595 and the hybrid would be incorrect if based on a fixed probability estimate. Thus, prior to tests for  
596 ASE, a simple adjustment could be made, which would first require that each chromosome (or  
597 scaffold) be tested independently. Utilizing median fold-changes in the parents and the percentage of  
598 reads in the hybrid attributable to the diploid parent, a probability of success under the null could be  
599 properly assigned.

600 Beyond the fact that the parents in this study were highly heterozygous, it is possible that CNV or  
601 aneuploidy can help explain some of the variation in heterosis observed within and among triploid  
602 families. In aneuploid studies, changing numerous chromosome segments can alter quantitative  
603 characters (Guo and Birchler 1994). Here, genome-wide averages of ASE attributable to the diploid  
604 parent (diploid %) in triploids was inversely correlated with heterosis for important stem growth  
605 traits (e.g., total harvestable biomass), but positively with foliar traits. The dosage balance  
606 hypothesis, outlined by Birchler (2005), may very well apply to slight deviations in the global  
607 inheritance of parent ASE or major differences in chromosomal copy number, as was observed for  
608 *Salix* chr09 aberrations in families 415 and 423. Genetic mapping in F<sub>2</sub> *S. purpurea* (Carlson *et al.*  
609 2019) identified QTL on chr09 for leaf length, leaf perimeter, and specific leaf area, so positive

610 correlations between diploid % and foliar traits could indicate a dosage sensitivity of genes  
611 controlling the variation for these traits.

612 A cluster of genes collocated on a 50 kb interval on chr10 contained genes highly-expressed in  
613 tetraploid *S. miyabeana* parents and triploid progeny, but with very low expression in diploid parents.  
614 These genes included duplicates, annotated as 3'-N-debenzoyl-2'-deoxytaxol N-benzoyltransferase  
615 (DBTNBT, TAX10), which catalyzes the final step in biosynthesis of the anti-cancer compound  
616 Taxol (Walker *et al.* 2002). The constitutive high expression levels of DBTNBT in triploids and  
617 tetraploid *S. miyabeana* parents could suggest involvement in the synthesis of an important defensive  
618 compound in *Salix*. There are multiple copies of genes with this annotation in the *Salix* genome and a  
619 number of them collocate with QTL for variation in tremuloidin on chr08, 10, 15, and 16 (Keefover-  
620 Ring *et al.*, in preparation). The abundance of tremuloidin or a related phenolic glycoside could be a  
621 source of broad-spectrum pest and/or disease resistance conferred to triploid hybrids by *S. miyabeana*  
622 parents, as all triploid genotypes in Carlson and Smart (2021) displayed field resistance to most  
623 willow pests and pathogens, but not intra- and interspecific diploids. In a F<sub>2</sub> *S. purpurea* mapping  
624 population, Carlson *et al.* (2019) identified QTL associated with many important traits for biomass  
625 production. One QTL for willow leaf rust (*Melampsora* spp.) incidence was identified on chr10, and  
626 DBTNBT genes described here fall within that confidence interval, meriting further investigation.

### 627 **Nonadditive gene expression correlates with nonadditive phenotypic expression**

628 One of the major challenges in molecular genetics is disentangling the relationship of transcriptome-  
629 wide expression patterns to phenotypic effects (Birchler *et al.* 2007). Rather than concentrating on  
630 the terminologies of heterosis models (e.g., dominance, overdominance, or pseudo-overdominance),  
631 Birchler (2010) promoted a progression to a more nuanced quantitative and interactive or network-  
632 oriented framework for dissecting the phenomenon of heterosis. We utilized DNA-Seq and RNA-Seq



633 to unravel the underlying regulatory architecture of differential expression and improve our  
634 understanding of heterosis in high-yielding triploid hybrids of willow. We showed that the proportion  
635 of genes differentially expressed between diploid and tetraploid parents attributable to nonadditive  
636 gene expression in the triploid hybrid (namely expression-level dominance) was positively correlated  
637 with heterosis for biomass yield as well as biomass-related growth traits collected in the greenhouse  
638 and in the field. In addition, we corroborate some of the key findings reported in Kremling *et al.*  
639 (2018), for example that cumulative expression dysregulation is inversely correlated with heterosis  
640 for biomass; and that individuals with greater absolute expression tended to display greater levels of  
641 dysregulation.

642 Importantly, tetraploid parent dominant genes among triploid hybrids were enriched for the following  
643 pathways: phenylpropanoid biosynthesis, cyanoamino acid metabolism, biosynthesis of secondary  
644 metabolites, and starch and sucrose metabolism. Some of the most intriguing tetraploid parent  
645 dominant genes identified in this study were those annotated as uridine diphosphate (UDP)  
646 glycosyltransferases (UGTs). UGTs catalyze the transfer of sugars to a wide range of acceptor  
647 molecules, including plant hormones, and all classes of plant secondary metabolites (Ross *et al.*  
648 2001). Both tetraploid parent dominant genes and those genes positively correlated with biomass  
649 yield and stem growth traits were enriched for the GO molecular function of catalytic activity.  
650 Further analysis of these candidate genes and gene sets, with regards to their relevance in overlapping  
651 support intervals from mapping experiments or regulatory patterns in other high-yielding triploid  
652 hybrid individuals, will prove useful in the genetic improvement of shrub willow as a bioenergy crop.

### 653 **Parent differentially expressed genes are most predictive of heterosis in F<sub>1</sub> hybrids**

654 Here, we tested whether parent differentially expressed genes are predictive of heterosis in three  
655 interspecific triploid F<sub>1</sub> *Salix* crosses, by comparing prediction accuracies of those gene sets to a



656 random sampling of genes as well as a selection of genes most highly expressed. While it would be  
657 assumed that the most highly expressed genes would also be the most variable, these genes had the  
658 lowest mean prediction accuracies for most traits and performed similarly as did a random sampling  
659 of genes of equal size. Differentially expressed genes were most predictive of heterosis, and often  
660 more so using a reduced gene set of only common, overlapping differentially expressed genes among  
661 family parent pairs. However, there were a handful of traits where prediction accuracies of all gene  
662 sets were not considerably different from that of a random sample. This could mean that midparent  
663 heterosis values are attributable to population structure and/or highly quantitative in nature, such that  
664 a random gene sample is sufficient to illustrate the inherent transcriptome-wide differences between  
665 parent species. Thus, strong family-specific responses to hybridization and transgressive phenotypic  
666 expression would result in higher prediction accuracies for specific traits that have high among but  
667 not within family variances. Yet, this was not often the case. The phenotypes used in this study were  
668 from Carlson and Smart (2021), which reported both hybrid vigor and hybrid necrosis within all  
669 intra- and interspecific  $F_1$  families in field and greenhouse conditions. Midparent heterosis values  
670 were normally distributed, besides traits with low variance, like later vegetative phenology dates.

671 Genes that were differentially expressed between the parents showed primarily additive and  
672 dominant inheritance patterns among  $F_1$  progeny, but segregated within families. Progeny individuals  
673 with a greater frequency of genes with dominant expression patterns were more apt to display  
674 heterosis for biomass growth. Further, genes that were differentially expressed between parents were  
675 more predictive of heterosis in  $F_1$  progeny compared to a random sampling of genes, irrespective of  
676 expression level. These gene sets could be used to aid in the selection of genotypes or breeding  
677 populations in the greenhouse by utilizing expression levels as an indicator of performance based on  
678 prior related datasets. While only three species were assayed in this study, the inclusion of additional,  
679 diverse parent species of varying heterozygosity would help determine if there is a core set of genes

680 and/or transcriptional regulators that, when differentially expressed, comprise a network predictive of  
681 triploid heterosis in  $F_1$  crosses.

682 This work highlights regulatory factors influencing differential expression, as well as genes and gene  
683 sets predictive of heterosis for biomass growth, physiological, and wood chemical composition traits  
684 collected in the greenhouse and field. It is vital that we apply our ever-improving understanding of  
685 heterosis from studies of well-characterized diploid crop species, such as maize, tomato, and rice to  
686 the improvement of yield and biomass quality of undomesticated crops, including willow and poplar,  
687 which provide sustainable sources of lignocellulosic biomass for bioenergy, biofuels, and  
688 bioproducts. Additional characterization of the genomic basis of heterosis in related genera or more  
689 diverse *Salix* crosses will be valuable in understanding the broad evolutionary benefits of wide  
690 hybridization and incidence of polyploidy.

#### 691 **DATA AVAILABILITY STATEMENT**

692 The gene expression data (File S1), heterosis values (File S2), and gene-trait correlations (File S3)  
693 used in this paper, as well as Supplementary Tables S1-S7 and Figures S1-S4 are available online:  
694 [www.github.com/Willowpedia/Carlson2021\\_TriploidHeterosis](http://www.github.com/Willowpedia/Carlson2021_TriploidHeterosis).

#### 695 **ACKNOWLEDGEMENTS**

696 We are grateful to Lauren Carlson and Dawn Fishback for their excellent technical assistance, and to  
697 Dr. Fred Gouker and Dr. Eric Fabio for their assistance with harvest, processing, and tissue  
698 collection.

#### 699 **FUNDING**

700 This research was supported by U.S. Department of Energy Office of Science, Office of Biological  
701 and Environmental Research, grant DE-SC0008375.

702 **CONFLICTS OF INTEREST**

703 The authors declare that the research was conducted in the absence of any commercial or financial  
704 relationships that could be construed as a potential conflict of interest.

705 **AUTHOR CONTRIBUTIONS**

706 CHC wrote the manuscript, performed DNA and RNA isolations, phenotyping, bioinformatics, and  
707 statistics, YC and APC conducted sequencing and bioinformatics, CT and LBS devised the study and  
708 managed research programs. All authors participated in reviewing and editing the manuscript.

709

710

## LITERATURE CITED

- 711 Auger, D. L., A. D. Gray, T. S. Ream, A. Kato, E. H. Coe *et al.*, 2005 Nonadditive gene expression  
712 in diploid and triploid hybrids of maize. *Genetics* 169: 389-397.
- 713 Baldauf, J. A., C. Marcon, A. Paschold, and F. Hochholdinger, 2016 Nonsyntenic genes drive tissue-  
714 specific dynamics of differential, nonadditive, and allelic expression patterns in maize hybrids.  
715 *Plant Phys.* 171: 1144-1155.
- 716 Bell, G. D., N. C. Kane, L. H. Rieseberg, and K. L. Adams, 2013 RNA-seq analysis of allele-specific  
717 expression, hybrid effects, and regulatory divergence in hybrids compared with their parents from  
718 natural populations. *Gen. Biol. Evol.* 5: 1309-1323.
- 719 Berlin, S., U. Lagercrantz, S. von Arnold, T. Öst, and A. Rönnerberg-Wästljung, 2010 High-density  
720 linkage mapping and evolution of paralogs and orthologs in *Salix* and *Populus*. *BMC Genomics*  
721 11: 129.
- 722 Birchler, J. A., D. L. Auger, and N. C. Riddle, 2003 In search of the molecular basis of heterosis.  
723 *Plant Cell* 15: 2236-2239.
- 724 Birchler, J. A., N. C. Riddle, D. L. Auger, and R. A. Veitia, 2005 Dosage balance in gene regulation:  
725 biological implications. *Trends Genet.* 21: 219-226.
- 726 Birchler, J. A., and R. A. Veitia, 2007 The gene balance hypothesis: From classical genetics to  
727 modern genomics. *Plant Cell* 19: 395-402.
- 728 Birchler, J.A., 2010 Heterosis. *Plant Cell* 22: 2105-2112.

- 729 Birchler, J. A., and R. A. Veitia, 2010 The gene balance hypothesis: Implications for gene regulation,  
730 quantitative traits and evolution. *New Phytol.* 186: 54-62.
- 731 Cameron, K. D., I. S. Phillips, R. F. Kopp, T. A. Volk, C. A. Maynard *et al.*, 2008 Quantitative  
732 genetics of traits indicative of biomass production and heterosis in 34 full-sib F<sub>1</sub> *Salix*  
733 *eriocephala* families. *BioEnergy Res.* 1: 80-90.
- 734 Carlson, C. H., and L. B. Smart, 2016 Electrical capacitance as a predictor of root dry weight in  
735 shrub willow (*Salix*; Salicaceae) parents and progeny. *Appl. Plant Sci.* 4: e1600031.
- 736 Carlson, C. H., Y. Choi, A. P. Chan, M. J. Serapiglia, C. D. Town *et al.*, 2017 Dominance and sexual  
737 dimorphism pervade the *Salix purpurea* L. transcriptome. *Gen. Biol. Evol.* 9: 2377-2394.
- 738 Carlson, C.H., F.E. Gouker, C. R. Crowell, L. M. Evans, S. P. DiFazio *et al.*, 2019 Joint linkage and  
739 association mapping of complex traits in shrub willow (*Salix purpurea* L.). *Ann. Bot.* 124: 701-  
740 716.
- 741 Carlson, C. H., and L. B. Smart, 2021 Heterosis for biomass-related traits in interspecific triploid  
742 hybrids of willow (*Salix* spp.). *BioEnergy Res.* doi: 10.1007/s12155-021-10305-0
- 743 Chen, C. Z., and C. S. Pikaard, 1997 Transcriptional analysis of nucleolar dominance in polyploid  
744 plants: Biased expression/silencing of progenitor rRNA genes is developmentally regulated  
745 in *Brassica*. *Proc. Natl. Acad. Sci. U. S. A.* 94: 3442-3447.
- 746 Combes, M. C., Y. Hueber, A. Dereeper, S. Rialle, J. C. Herrera *et al.*, 2015 Regulatory divergence  
747 between parental alleles determines gene expression patterns in hybrids. *Mol. Biol. Evol.* 7:  
748 1110-1121.

- 749 DePristo, M. A., E. Banks, R. Poplin, K. V. Garimella, J. R. Maguire *et al.*, 2011 A framework for  
750 variation discovery and genotyping using next-generation DNA sequencing data. *Nat. Genet.* 43:  
751 491-498.
- 752 Donoghue, M. T., A. Fort, R. Clifton, X. Zhang, P. C. McKeown, *et al.*, 2014 C(m)CGG  
753 methylation-independent parent-of-origin effects on genome-wide transcript levels in isogenic  
754 reciprocal F1 triploid plants. *DNA Res.* 21: 141–151.
- 755 East, E. M., 1936 Heterosis. *Genetics* 21: 375-397.
- 756 Fabio, E. S., T. A. Volk, R. O. Miller, M. J. Serapiglia, H. G. Gauch *et al.*, 2016 Genotype x  
757 environment interactions analysis of North American shrub willow yield trials confirms superior  
758 performance of triploid hybrids. *Glob. Change Biol. Bioenergy* 9: 445-459.
- 759 Fabio, E. S., A. R. Kemanian, F. Montes, R. O. Miller, and L. B. Smart, 2017 A mixed model  
760 approach for evaluating yield improvements in interspecific hybrids of shrub willow, a dedicated  
761 bioenergy crop. *Ind. Crop Prod.* 96: 57-70.
- 762 Friedman, J., T. Hastie, and R. Tibshirani, 2010 Regularization paths for generalized linear models  
763 via coordinate descent. *J. Stat. Soft.* 33: 1-22.
- 764 Goff, S. A., 2011 A unifying theory for general multigenic heterosis: energy efficiency, protein  
765 metabolism, and implications for molecular breeding. *New Phytol.* 189: 923-37.
- 766 Gouker, F. E., C. H. Carlson, J. Zou, L. M. Evans, C. R. Crowell *et al.*, 2021 Sexual dimorphism in  
767 the dioecious willow *Salix purpurea*. *Am. J. Bot.* 108: 1374-1387.

- 768 Gunter, L. E., G. T. Roberts, K. Lee, F. W. Larimer, and G. A. Tuskan, 2003 The development of  
769 two flanking SCAR markers linked to a sex determination locus in *Salix viminalis* L. J. Hered.  
770 94: 185-189.
- 771 Guo, M., and J. A. Birchler, 1994 *Trans*-acting dosage effects on the expression of model gene  
772 systems in maize aneuploids. Science 266: 1999-2002.
- 773 Guo, M., D. Davis, and J. A. Birchler, 1996 Dosage effects on gene expression in a maize ploidy  
774 series. Genetics 142: 1349-1355.
- 775 Guo, M., M. A. Rupe, C. Zinselmeier, J. Habben, B. A. Bowen *et al.*, 2004 Allelic variation of gene  
776 expression in maize hybrids. Plant Cell 16: 1707-1716.
- 777 Guo, M., M. A. Rupe, X. Yang, O. Crasta, C. Zinselmeier *et al.*, 2006 Genome-wide transcript  
778 analysis of maize hybrids: allelic additive gene expression and yield heterosis. Theor. Appl.  
779 Genet. 113: 831-845.
- 780 Hallingbäck, H. R., J. Fogelqvist, S. J. Powers, J. Turrion-Gomez, R. Rossiter *et al.*, 2016  
781 Association mapping in *Salix viminalis* L. (Salicaceae) – identification of candidate genes  
782 associated with growth and phenology. Glob. Change Biol. Bioenergy 8: 670-685.
- 783 Hanley, S. J., and A. Karp, 2013 Genetic strategies for dissecting complex traits in biomass willows  
784 (*Salix* spp.). Tree Physiol. 34: 1167-1180.
- 785 He, G.M., X. P. Zhu, A. A. Elling, L. B. Chen, X. F. Wang *et al.*, 2010. Global epigenetic and  
786 transcriptional trends among two rice subspecies and their reciprocal hybrids. Plant Cell 22: 17-  
787 33.



- 788 Hyden, B., C. H. Carlson, F. E. Gouker, J. Schmutz, K. Barry *et al.*, 2021 Integrative genomics  
789 reveals paths to sex dimorphism in *Salix purpurea* L. Hort. Res. 8: 170.
- 790 Kopp, R. F., L. B. Smart, C. A. Maynard, J. G. Isebrands, G. A. Tuskan *et al.*, 2001 The development  
791 of improved willow clones for eastern North America. Forest. Chron. 77: 287-292.
- 792 Kremling, K. A. G., S. Y. Chen, M. H. Su, N. K. Lepak, C. Romay *et al.*, 2018 Dysregulation of  
793 expression correlates with rare allele burden and fitness loss in maize. Nature 555: 520-523.
- 794 Kuzovkina, Y. A., M. Weih, M. A. Romero, J. Charles, S. Hust *et al.*, 2008 *Salix*: Botany and global  
795 horticulture, pp. 447-489 in *Horticulture Reviews*, edited by J. Jannick. John Wiley & Sons, New  
796 Jersey.
- 797 Landry, C. R., P. J. Wittkopp, C. H. Taubes, J. M. Ranz, A. G. Clark *et al.*, 2005 Compensatory *cis*-  
798 *trans* evolution and the dysregulation of gene expression in interspecific hybrids of *Drosophila*.  
799 Genetics 171: 1813-1822.
- 800 Langfelder, P., and S. Horvath, 2008 WGCNA: An R package for weighted correlation network  
801 analysis. BMC Bioinform. 9: 559.
- 802 Li, H., and R. Durbin, 2009 Fast and accurate short read alignment with Burrows-Wheeler transform.  
803 Bioinform. 25: 1754-1760.
- 804 McManus, C. J., J. D. Coolon, M. O. Duff, J. Eipper-Mains, B. R. Graveley *et al.*, 2010 Regulatory  
805 divergence in *Drosophila* revealed by mRNA-seq. Genome Res. 20: 816-825.
- 806 McMullen, M. D., S. Kresovich, H. S. Villeda, P. Bradbury, H. Li *et al.*, 2009 Genetic properties of  
807 the maize nested association mapping population. Science 325: 737-740.

- 808 Ni, Z. F., E. D. Kim, M. S. Ha, E. Lackey, J. X. Liu *et al.*, 2009 Altered circadian rhythms regulate  
809 growth vigour in hybrids and allopolyploids. *Nature* 457: 327.
- 810 R Core Team, 2021 R: A language and environment for statistical computing. Vienna, Australia: R  
811 Foundation for Statistical Computing.
- 812 Riddle, N. C., H. M. Jiang, L. L. An, R. W. Doerge, and J. A. Birchler, 2010 Gene expression  
813 analysis at the intersection of ploidy and hybridity in maize. *Theor. Appl. Genet.* 120: 341-353.
- 814 Ross, J., Y. Li, E. K. Lim, and D. J. Bowles, 2001 Higher plant glycosyltransferases. *Genome Biol.*  
815 2: reviews3004.1-3004.6.
- 816 Robinson, M. D., D. J. McCarthy, and G. K. Smyth, 2010 edgeR: a Bioconductor package for  
817 differential expression analysis of digital gene expression data. *Bioinform.* 26: 139-140.
- 818 Serapiglia, M. J., K. D. Cameron, A. J. Stipanovic, and L. B. Smart, 2012 Correlations of expression  
819 of cell wall biosynthesis genes with variation in biomass composition in shrub willow (*Salix* spp.)  
820 biomass crops. *Tree Genet. Genome* 8: 775-788.
- 821 Serapiglia, M. J., F. E. Gouker, J. F. Hart, F. Unda, S. D. Mansfield *et al.*, 2014a Ploidy level affects  
822 important biomass traits of novel shrub willow (*Salix*) hybrids. *BioEnergy Res.* 8: 259-269.
- 823 Serapiglia, M. J., F. E. Gouker, and L. B. Smart, 2014b Early selection of novel triploid hybrids of  
824 shrub willow with improved biomass yield relative to diploids. *BMC Plant Biol.* 14: 74.
- 825 Shi, X., D. W. K. Ng, C. Zhang, L. Comai, W. Ye *et al.*, 2012 *Cis*- and *trans*-regulatory divergence  
826 between progenitor species determines gene-expression novelty in *Arabidopsis* allopolyploids.  
827 *Nat. Comm.* 3: 950.

- 828 Smart, L. B., and K. D. Cameron, 2008 Genetic improvement of willow (*Salix* spp.) as a dedicated  
829 bioenergy crop, pp. 377-396 in *Genetic Improvement of Bioenergy Crops*, edited by W.  
830 Vermerris. Springer Science, New York.
- 831 Song, G., Z. Guo, Z. Liu, Q. Cheng, X. Qu *et al.*, 2013 Global RNA sequencing reveals that  
832 genotype-dependent allele-specific expression contributes to differential expression in rice F<sub>1</sub>  
833 hybrids. *BMC Plant Biol.* 13: 221.
- 834 Springer, N. M., and R. M. Stupar, 2007 Allele-specific expression patterns reveal biases and  
835 embryo-specific parent-of-origin effects in hybrid maize. *Plant Cell* 19: 2391-2402.
- 836 Stupar, R. M., and N. M. Springer, 2006 *Cis*-transcriptional variation in maize inbred lines B73 and  
837 Mo17 leads to additive expression patterns in the F<sub>1</sub> hybrid. *Genetics* 173: 2199-2210.
- 838 Stupar, R. M., P. J. Hermanson, and N. M. Springer, 2007 Nonadditive expression and parent-of-  
839 origin effects identified by microarray and allele-specific expression profiling of maize  
840 endosperm. *Plant Physiol.* 145: 411-425.
- 841 Stupar, R. M., J. M. Gardiner, A. G. Oldre, W. J. Haun, V. L. Chandler *et al.*, 2008 Gene expression  
842 analyses in maize inbreds and hybrids with varying levels of heterosis. *BMC Plant Biol.* 8: 33.
- 843 Swanson-Wagner, R. A., Y. Jia, R. DeCook, L. A. Borsuk, D. Nettleton *et al.*, 2006 All possible  
844 modes of gene action are observed in a global comparison of gene expression in a maize F<sub>1</sub>  
845 hybrid and its inbred parents. *Proc. Nat. Acad. Sci. U. S. A.* 103: 6805-6510.
- 846 Veitia, R. A., S. Bottani, and J. A. Birchler, 2008 Cellular reactions to gene dosage balance:  
847 Genomic, transcriptomic and proteomic effects. *Trends Genet.* 24: 390-397.

- 848 Walker, K., R. Long, and R. Croteau, 2002 The final acylation step in Taxol biosynthesis: Cloning of  
849 the taxoid C13-side-chain *N*-benzoyltransferase from *Taxus*. Proc. Nat. Acad. Sci. U. S. A. 99:  
850 9166-9171.
- 851 Wei, G., Y. Tao, G. Z. Liu, C. Chen, R. Y. Luo *et al.*, 2009 A transcriptomic analysis of superhybrid  
852 rice LYP9 and its parents. Proc. Nat. Acad. Sci. U. S. A. 106: 7695-7701.
- 853 Wittkopp, P. J., B. K. Haerum, and A. G. Clark, 2004 Evolutionary changes in *cis* and *trans* gene  
854 regulation. Nature 430: 85-88.
- 855 Wittkopp, P. J., B. K. Haerum, and A. G. Clark, 2008a Regulatory changes underlying expression  
856 differences within and between *Drosophila* species. Nat. Genet. 40: 346-350.
- 857 Wittkopp, P. J., B. K. Haerum, and A. G. Clark, 2008b Independent effects of *cis*- and *trans*-  
858 regulatory variation on gene expression in *Drosophila melanogaster*. Genetics 178: 1831-1835.
- 859 Wittkopp, P. J., and G. Kalay, 2011 *Cis*-regulatory elements: molecular mechanisms and  
860 evolutionary processes underlying divergence. Nat. Rev. Genet. 13: 59-69.
- 861 Wray, G., 2007 Evolutionary significance of *cis*-regulatory mutations. Nat. Rev. Genet. 8: 206-216.
- 862 Xu, C., Y. Bai, Y. Lin, N. Zhao, L. Hu *et al.*, 2014 Genome-wide disruption of gene expression in  
863 allopolyploids but not hybrids of rice subspecies. Mol. Biol. Evol. 31: 1066-1076.
- 864 Zhou, R., D. Macaya-Sanz, E. Rodgers-Melnick, C. H. Carlson, F. E. Gouker *et al.*, 2018  
865 Characterization of a large sexually dimorphic genome interval in *Salix purpurea* L. (Salicaceae).  
866 Mol. Genet. Genom. 293: 1437-1452.

867 Zhuang, Y., and K. L. Adams, 2007 Extensive allelic variation in gene expression in *Populus* F<sub>1</sub>  
868 hybrids. *Genetics* 177: 1987-1996.

869

870

871

872

873

## TABLES

874 **Table 1.** Number of differentially expressed genes between triploid family parents.

| Family | Female (P1) parent | Male (P2) parent | P1 > P2 (%)  | P1 < P2 (%)  | P1 = P2 (%)   | Total  |
|--------|--------------------|------------------|--------------|--------------|---------------|--------|
| 415    | 94006 [2x]         | 01-200-003 [4x]  | 2,661 (10.7) | 2,505 (10.1) | 19,641 (79.2) | 24,807 |
| 423    | 07-MBG-5027 [2x]   | 01-200-003 [4x]  | 2,469 (9.86) | 3,054 (12.2) | 19,519 (77.9) | 25,042 |
| 430    | 01-200-006 [4x]    | Jorr [2x]        | 2,467 (9.81) | 2,688 (10.7) | 19,993 (79.5) | 25,148 |

875

876

877

878

879

880

881

882

883

884

885

886

887

888

889

890

891

892

893

894

895

896

897

898

899

900

901

902

903

904

905

906

907

908

909

910

911

912

913

914

915 **Table 2.** Number of genes assigned to inheritance classifications in triploid F<sub>1</sub> progeny individuals  
 916 and their averages by family.

| Family                                                 | P1-<br>dominant | P2-<br>dominant | Over-<br>dominant | Under-<br>dominant | Additive     | Conserved     |
|--------------------------------------------------------|-----------------|-----------------|-------------------|--------------------|--------------|---------------|
| <b>415 (<i>S. purpurea</i> × <i>S. miyabeana</i>)</b>  |                 |                 |                   |                    |              |               |
| 415-018                                                | 236             | 960             | 0                 | 28                 | 3,010        | 20,573        |
| 415-020                                                | 376             | 1,109           | 0                 | 31                 | 2,786        | 20,505        |
| 415-023                                                | 336             | 1,024           | 0                 | 23                 | 2,842        | 20,582        |
| 415-031                                                | 343             | 1,209           | 1                 | 40                 | 2,760        | 20,454        |
| 415-038                                                | 308             | 1,048           | 0                 | 35                 | 2,887        | 20,529        |
| 415-054                                                | 414             | 945             | 0                 | 20                 | 2,882        | 20,546        |
| 415-073                                                | 326             | 1,038           | 0                 | 34                 | 2,864        | 20,545        |
| 415-074                                                | 280             | 869             | 0                 | 18                 | 3,034        | 20,606        |
| 415-082                                                | 334             | 1,208           | 2                 | 29                 | 2,702        | 20,532        |
| 415-257                                                | 331             | 1,298           | 2                 | 44                 | 2,633        | 20,499        |
| <b>Mean</b>                                            | <b>328</b>      | <b>1,071</b>    | <b>1</b>          | <b>30</b>          | <b>2,840</b> | <b>20,537</b> |
| <b>423 (<i>S. viminalis</i> × <i>S. miyabeana</i>)</b> |                 |                 |                   |                    |              |               |
| 423-004                                                | 447             | 1,219           | 14                | 51                 | 1,544        | 21,767        |
| 423-034                                                | 268             | 895             | 7                 | 12                 | 1,759        | 22,101        |
| 423-043                                                | 302             | 1,282           | 5                 | 31                 | 1,513        | 21,909        |
| 423-048                                                | 325             | 1,428           | 7                 | 27                 | 1,447        | 21,808        |
| 423-051                                                | 286             | 1,055           | 8                 | 19                 | 1,681        | 21,993        |
| 423-063                                                | 422             | 1,116           | 8                 | 21                 | 1,593        | 21,882        |
| 423-066                                                | 278             | 1,021           | 7                 | 21                 | 1,707        | 22,008        |
| 423-067                                                | 317             | 1,247           | 10                | 22                 | 1,543        | 21,903        |
| 423-070                                                | 491             | 1,337           | 26                | 29                 | 1,466        | 21,693        |
| 423-072                                                | 324             | 1,332           | 3                 | 34                 | 1,495        | 21,854        |
| <b>Mean</b>                                            | <b>346</b>      | <b>1,193</b>    | <b>10</b>         | <b>27</b>          | <b>1,575</b> | <b>21,892</b> |

**430 (*S. miyabeana* × *S. viminalis*)**

|             |              |            |          |           |              |               |
|-------------|--------------|------------|----------|-----------|--------------|---------------|
| 430-004     | 1,498        | 370        | 5        | 41        | 1,330        | 21,904        |
| 430-005     | 1,517        | 340        | 4        | 29        | 1,249        | 22,009        |
| 430-006     | 867          | 274        | 5        | 22        | 1,609        | 22,371        |
| 430-016     | 1,067        | 285        | 7        | 16        | 1,492        | 22,281        |
| 430-018     | 1,162        | 291        | 6        | 14        | 1,410        | 22,265        |
| 430-025     | 1,175        | 283        | 2        | 25        | 1,380        | 22,283        |
| 430-031     | 1,026        | 279        | 6        | 20        | 1,482        | 22,335        |
| 430-033     | 1,007        | 458        | 6        | 31        | 1,496        | 22,150        |
| 430-034     | 1,519        | 351        | 14       | 21        | 1,295        | 21,948        |
| 430-035     | 704          | 207        | 3        | 16        | 1,780        | 22,438        |
| <b>Mean</b> | <b>1,154</b> | <b>314</b> | <b>6</b> | <b>24</b> | <b>1,452</b> | <b>22,198</b> |

917

918

919

920

921

922

923

924

925

926

927

928

929

930

931

932

933

934

935

936

937

938

939



940 **Table 3.** Number of genes assigned to regulatory divergence classifications (FDR = 0.005) in triploid  
 941 F<sub>1</sub> individuals and their means by family.

| Family                                                 | <i>cis</i> | <i>trans</i> | <i>cis</i> + <i>trans</i> | <i>cis</i> × <i>trans</i> | Compensatory | Ambiguous    | Conserved     |
|--------------------------------------------------------|------------|--------------|---------------------------|---------------------------|--------------|--------------|---------------|
| <b>415 (<i>S. purpurea</i> × <i>S. miyabeana</i>)</b>  |            |              |                           |                           |              |              |               |
| 415-018                                                | 152        | 210          | 21                        | 34                        | 36           | 1,151        | 13,692        |
| 415-020                                                | 412        | 123          | 32                        | 36                        | 44           | 1,084        | 13,447        |
| 415-023                                                | 384        | 105          | 34                        | 35                        | 28           | 1,084        | 13,984        |
| 415-031                                                | 316        | 119          | 29                        | 32                        | 30           | 1,109        | 14,004        |
| 415-038                                                | 328        | 109          | 29                        | 29                        | 20           | 1,089        | 13,802        |
| 415-054                                                | 381        | 122          | 35                        | 32                        | 31           | 1,049        | 13,839        |
| 415-073                                                | 354        | 116          | 23                        | 41                        | 32           | 1,097        | 14,025        |
| 415-074                                                | 288        | 76           | 24                        | 22                        | 19           | 1,201        | 12,841        |
| 415-082                                                | 359        | 91           | 27                        | 25                        | 28           | 1,125        | 13,924        |
| 415-257                                                | 329        | 95           | 17                        | 22                        | 22           | 1,131        | 13,896        |
| <b>Mean</b>                                            | <b>330</b> | <b>117</b>   | <b>27</b>                 | <b>31</b>                 | <b>29</b>    | <b>1,112</b> | <b>13,745</b> |
| <b>423 (<i>S. viminalis</i> × <i>S. miyabeana</i>)</b> |            |              |                           |                           |              |              |               |
| 423-004                                                | 252        | 105          | 26                        | 28                        | 29           | 1,224        | 15,071        |
| 423-034                                                | 317        | 108          | 14                        | 48                        | 50           | 1,219        | 15,116        |
| 423-043                                                | 306        | 103          | 11                        | 33                        | 45           | 1,248        | 15,112        |
| 423-048                                                | 178        | 94           | 10                        | 14                        | 18           | 1,284        | 15,472        |
| 423-051                                                | 316        | 117          | 16                        | 38                        | 59           | 1,225        | 15,051        |
| 423-063                                                | 292        | 124          | 17                        | 24                        | 30           | 1,218        | 15,096        |
| 423-066                                                | 187        | 84           | 11                        | 24                        | 26           | 1,351        | 14,519        |
| 423-067                                                | 283        | 99           | 16                        | 33                        | 45           | 1,238        | 15,094        |
| 423-070                                                | 252        | 113          | 20                        | 36                        | 56           | 1,237        | 15,199        |
| 423-072                                                | 274        | 85           | 13                        | 35                        | 43           | 1,261        | 15,216        |
| <b>Mean</b>                                            | <b>266</b> | <b>103</b>   | <b>15</b>                 | <b>31</b>                 | <b>40</b>    | <b>1,251</b> | <b>15,095</b> |
| <b>430 (<i>S. miyabeana</i> × <i>S. viminalis</i>)</b> |            |              |                           |                           |              |              |               |

|             |            |            |           |           |           |              |               |
|-------------|------------|------------|-----------|-----------|-----------|--------------|---------------|
| 430-004     | 295        | 111        | 21        | 47        | 63        | 1,095        | 14,797        |
| 430-005     | 203        | 77         | 10        | 32        | 37        | 1,110        | 15,386        |
| 430-006     | 219        | 115        | 13        | 27        | 31        | 1,095        | 15,298        |
| 430-016     | 245        | 117        | 24        | 34        | 47        | 1,086        | 15,501        |
| 430-018     | 252        | 95         | 14        | 42        | 62        | 1,118        | 15,210        |
| 430-025     | 180        | 79         | 12        | 16        | 30        | 1,182        | 15,615        |
| 430-031     | 174        | 105        | 5         | 22        | 26        | 1,171        | 15,366        |
| 430-033     | 265        | 107        | 14        | 47        | 79        | 1,126        | 14,884        |
| 430-034     | 206        | 94         | 15        | 19        | 40        | 1,126        | 15,301        |
| 430-035     | 144        | 96         | 10        | 17        | 24        | 1,187        | 14,399        |
| <i>Mean</i> | <b>218</b> | <b>100</b> | <b>14</b> | <b>30</b> | <b>44</b> | <b>1,130</b> | <b>15,176</b> |

942

943

944

945

946

947

948

949

950

951

952

953

954

955 **Table 4.** Pearson correlation coefficients ( $r$ ) of heterosis for biomass-related traits and the mean  
 956 percentage of each locus in triploid progeny attributable to the respective diploid parent (diploid %).

| Trait                   | Trait Description          | Trait Class  | Time <sup>a</sup> | Year 1 <sup>b</sup> | Year 2    |
|-------------------------|----------------------------|--------------|-------------------|---------------------|-----------|
| <b>Field study</b>      |                            |              |                   |                     |           |
| HT                      | Plot height                | Stem growth  | 1, 2              | -0.82 ***           | -0.53 **  |
| STN                     | Stem number                | Stem growth  | 1                 | -0.41 *             | - n.s.    |
| MDIA                    | Mean stem diameter         | Stem growth  | 1, 2              | -0.47 *             | -0.40 *   |
| DIA                     | Stem diameter              | Stem growth  | 1, 2              | -0.54 **            | -0.51 **  |
| MSA                     | Mean stem area             | Stem growth  | 1                 | -0.41 *             | - n.s.    |
| SA                      | Stem area                  | Stem growth  | 1, 2              | -0.51 **            | -0.47 *   |
| VOL                     | Stem volume                | Stem growth  | 1, 2              | -0.53 **            | -0.52 **  |
| LFL                     | Leaf length                | Leaf growth  | 2                 | - n.s.              | 0.45 *    |
| LFP                     | Leaf perimeter             | Leaf growth  | 2                 | - n.s.              | 0.5 **    |
| LFR                     | Leaf ratio                 | Leaf growth  | 2                 | - n.s.              | 0.42 *    |
| LFF                     | Leaf shape factor          | Leaf growth  | 2                 | - n.s.              | -0.51 **  |
| SLA                     | Specific leaf area         | Leaf growth  | 1                 | 0.58 **             | n.s.      |
| CDIA                    | Basal crown diameter       | Architecture | 1, 2              | -0.40 *             | -0.65 *** |
| FOR                     | Crown form                 | Architecture | 1, 2              | 0.46 *              | 0.65 ***  |
| M                       |                            |              |                   |                     |           |
| DEN                     | Wood density               | Composition  | 2                 | - n.s.              | -0.41 *   |
| DVOL                    | Wood density × stem volume | Biomass      | 1, 2              | -0.56 **            | -0.58 **  |
| <b>Greenhouse study</b> |                            |              |                   |                     |           |
| SDW                     | Stem dry mass              | Biomass      | 70                | -0.52 **            |           |
| LDW                     | Leaf dry mass              | Biomass      | 70                | -0.57 **            |           |
| RDW                     | Root dry mass              | Biomass      | 70                | -0.73 ***           |           |
| AGB                     | Aboveground dry mass       | Biomass      | 70                | -0.56 **            |           |
| TBM                     | Total dry mass             | Biomass      | 70                | -0.65 ***           |           |
| HT                      | Plot height                | Stem growth  | 42, 21-56         | -0.68 ***           |           |

|      |                      |             |           |       |     |
|------|----------------------|-------------|-----------|-------|-----|
| MSL  | Mean stem length     | Stem growth | 42, 21-56 | -0.60 | *** |
| TSL  | Total stem length    | Stem growth | 42, 21-56 | -0.59 | **  |
| SA   | Stem area            | Stem growth | 70        | -0.48 | **  |
| VOL  | Stem volume          | Stem growth | 70        | -0.60 | *** |
| SLA  | Specific leaf area   | Leaf growth | 70        | 0.31  | *   |
| PHE  | Vegetative phenology | Leaf growth | 11, 13    | -0.52 | **  |
| SPAD | Chlorophyll content  | Leaf growth | 14        | -0.39 | *   |

---

<sup>a</sup>Time in years since coppice (field study) or days after planting (greenhouse study).

<sup>b</sup>Asterisks \*\*\*, \*\*, \* denote significant at  $p$ -value  $< 0.001$ ,  $< 0.01$ , and  $< 0.05$ , respectively.

957

958

959

960

961

962

963

964

965

966

967

968

969

970

971

972

973

974

## FIGURE CAPTIONS

975 **Figure 1.** Multi-dimensional scaling plot of library-normalized transcriptome-wide gene expression  
976 of all triploid F<sub>1</sub> progeny individuals (families 415, 423, and 430) and their diploid (94006, 07-MBG-  
977 5027, and ‘Jorr’) and tetraploid (01-200-006 and 01-200-003) parents. Panel (A) PC1 versus PC2,  
978 (B) PC1 versus PC3, (C) PC2 versus PC3, and (D) percent variance explained (% Ve) by the first 25  
979 PCs. Euclidean distances on the two-dimensional plot approximate leading log<sub>2</sub> fold-changes  
980 between samples, using the top 500 genes with the largest standard deviations. Parents and progeny  
981 libraries are colored according to the legend.

982 **Figure 2.** Superimposed dosage differential scatterplots of 10 individuals from each of the families  
983 415, 423, and 430 (left to right, respectively). Each point depicts the log<sub>2</sub> ratio of the diploid parent  
984 allele in the hybrid and the diploid parent allele in the parent against the log<sub>2</sub> ratio of the tetraploid  
985 parent allele in the hybrid and the tetraploid parent allele in the parent. Points are colored according  
986 to their regulatory assignment. Ellipses mask most of the distribution of log<sub>2</sub> dosage ratios ( $P_r =$   
987  $1 \times 10^{-5}$ ), such that points sitting outside ellipses are extreme outliers from expected dosage. Dotted  
988 lines at  $\log_2(1/3) = -1.585$  and  $\log_2(2/3) = -0.585$  represent distribution averages for diploid and  
989 tetraploid ratios, which is where the average distribution of dosage ratios is expected to occur.

990 **Figure 3.** Manhattan plot (A) chromosome-wide differences of log<sub>2</sub> ( $P_{2X} / P_{4X}$ ) expression (parent –  
991 hybrid) between the family 415 parents (female diploid 94006 and male tetraploid 01-200-003) and  
992 the triploid hybrid 12X-415-031. Median parent – hybrid values are shown above chromosome  
993 identifiers (x-axis). The barplot (B) depicts the median parent – hybrid difference (dark grey bars,  
994 scale top x-axis) and the percent expression in the hybrid attributable to the diploid parent allele  
995 (white bars, scale lower x-axis) by chromosome (y-axis). The Manhattan plot in panel (C) and

996 barplot in panel **(D)**, represent the same analyses, but between the family 423 parents (female diploid  
997 07-MBG-5027 and male tetraploid 01-200-003) and the triploid hybrid 12X-423-070. Red text on x-  
998 axes in panels **(A)** and **(D)** correspond to red asterisks on y-axes in panels **(B)** and **(C)**, which denote  
999 significant differences (Wilcoxon  $p$ -value  $< 1 \times 10^{-16}$ ).

1000 **Figure 4.** Correlations of nonadditive, regulatory divergent, and cumulative expression dysregulation  
1001 with heterosis for **(A)** greenhouse and **(B)** field phenotypes (Table S6). Pearson correlation  
1002 coefficients ( $r$ ), positive correlations are illustrated by filled blue squares and negative correlations by  
1003 filled-red squares. Non-significant correlations ( $p$ -value  $> 0.01$ ) were left blank. Significance levels  
1004 ( $p$ -values) were used to scale the area of each square, such that smaller squares represent correlation  
1005 coefficients with lower significance and larger squares represent those with greater significance.

1006 **Figure 5.** Prediction accuracies ( $R^2$ ) of heterosis values for **(A)** greenhouse and **(B)** field phenotypes  
1007 using selected and random gene expression sets (Table S6). These four gene sets were: differentially  
1008 expressed genes common among parent pairs (cyan,  $n = 379$ ), differentially expressed genes in at  
1009 least one parent pair (magenta,  $n = 4,978$ ), the most highly expressed genes (dark grey,  $n = 5,000$ ),  
1010 and a random sampling of genes (light grey,  $n = 5,000$ ). Boxplots to the right of each panel depict the  
1011 distribution of prediction accuracies, with means represented as yellow diamond points. Traits are  
1012 colored according to respective classes described in the lower left legend of each panel.

1013

1014

1015

1016

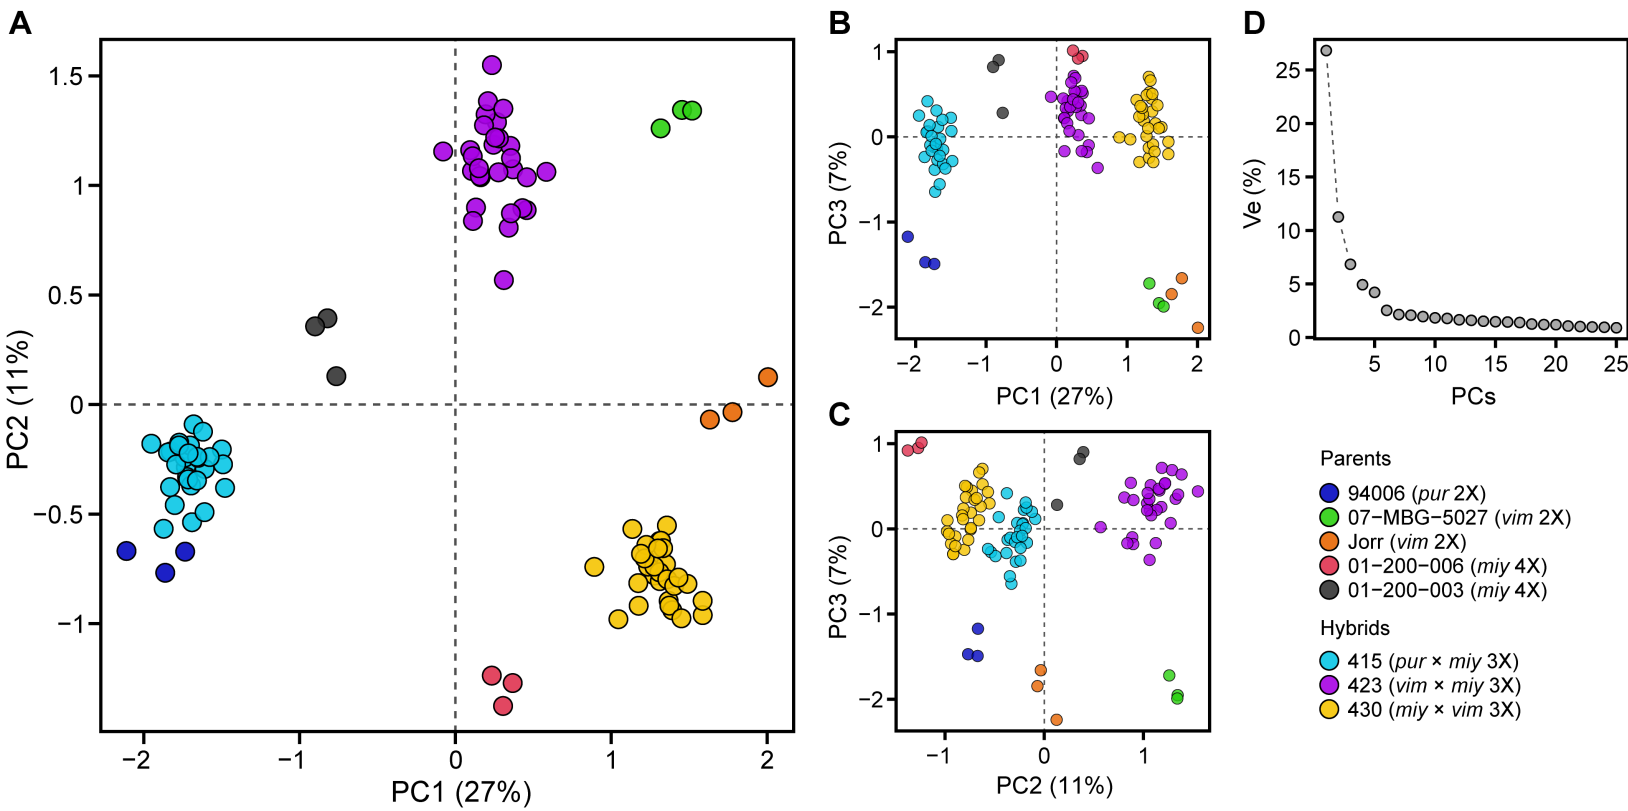

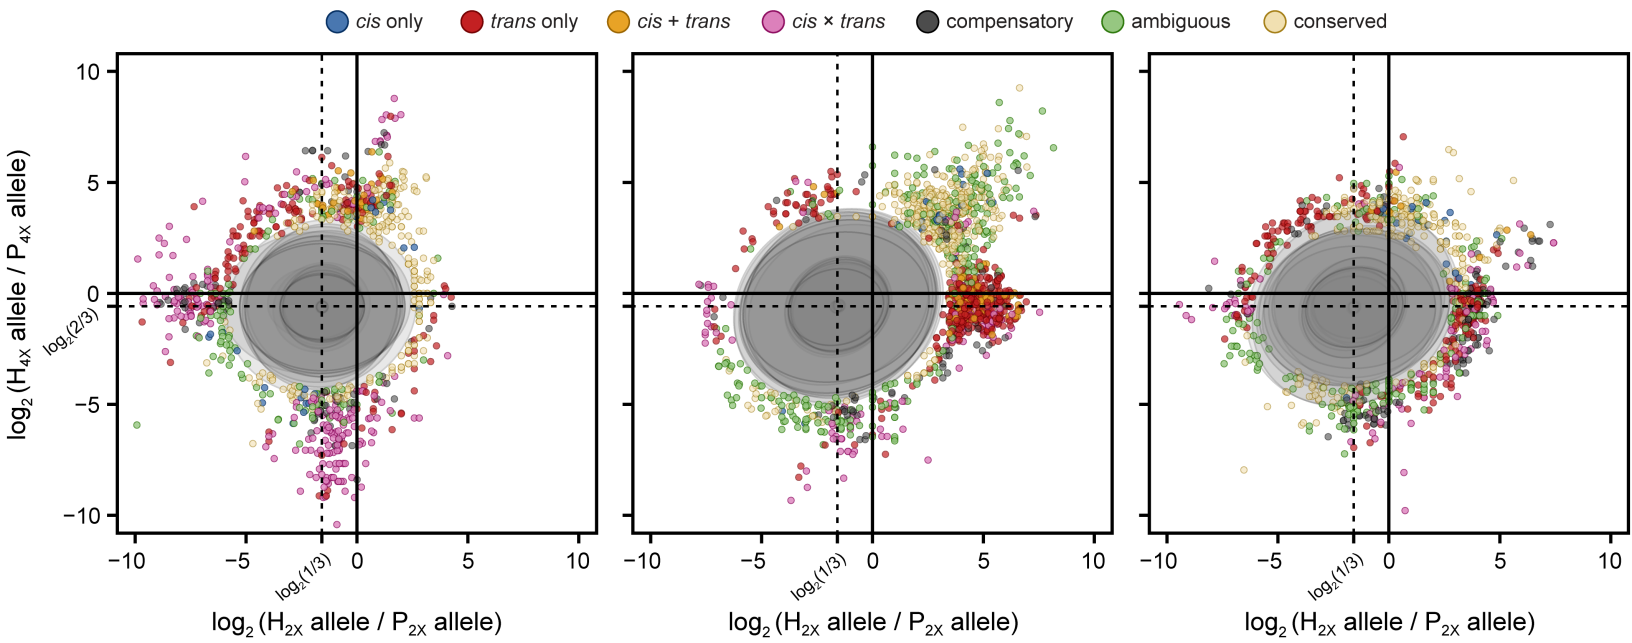



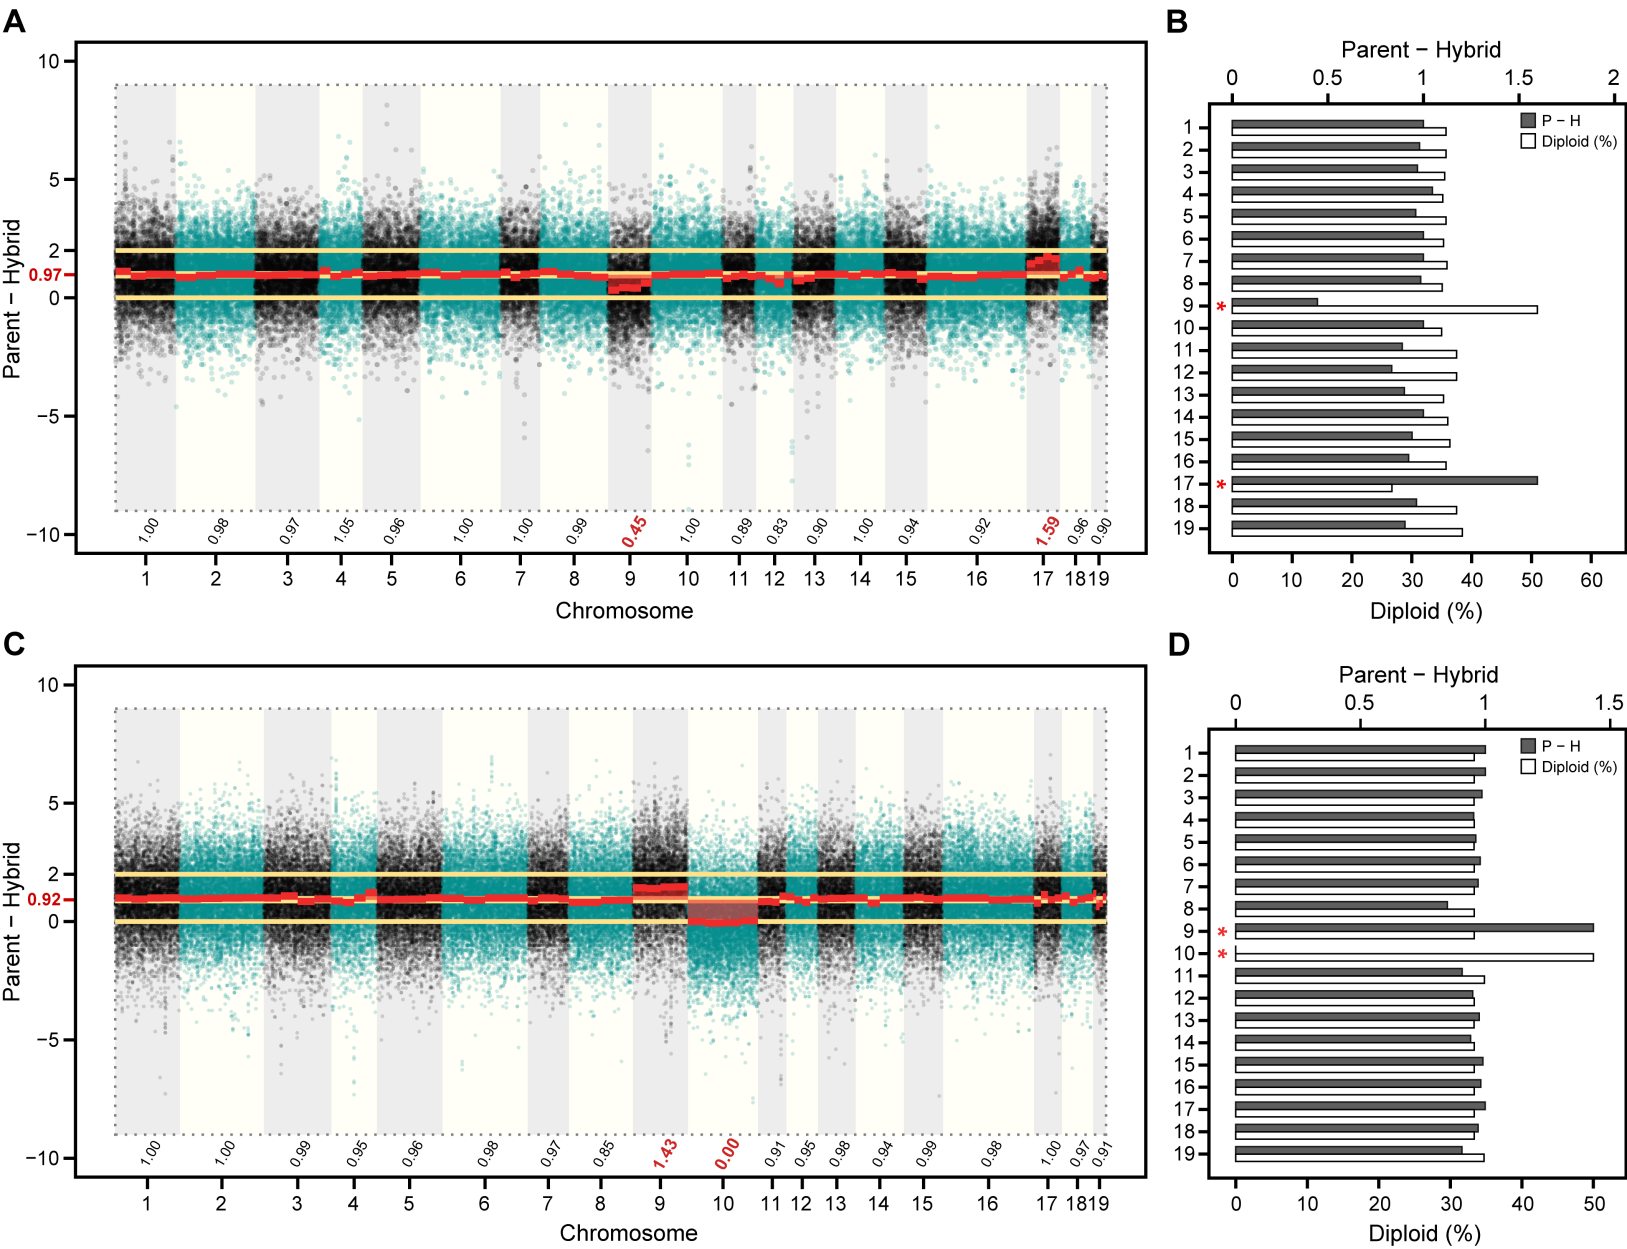

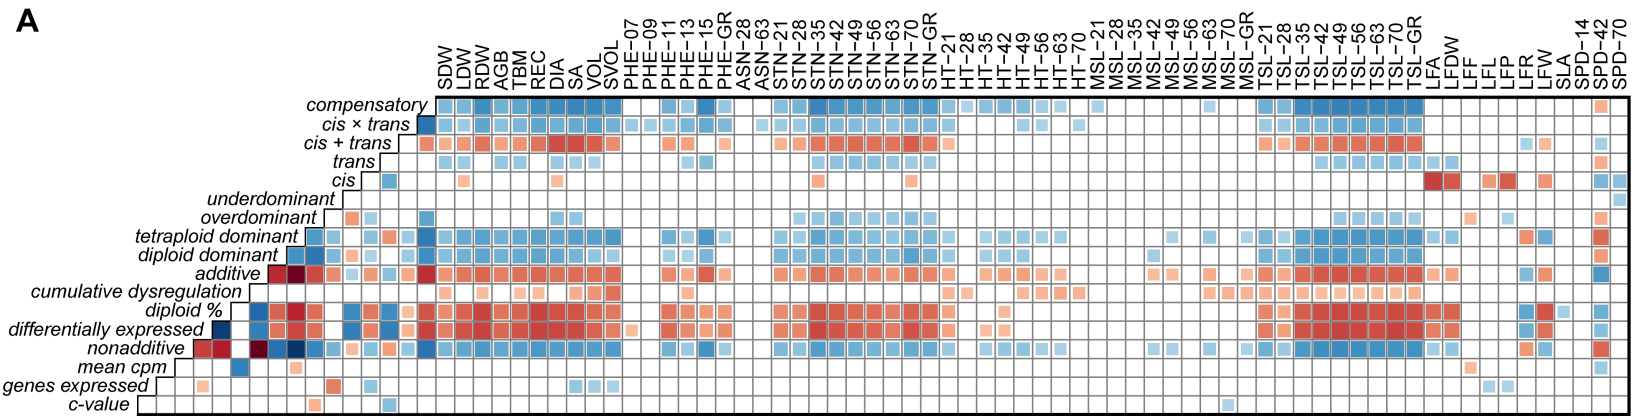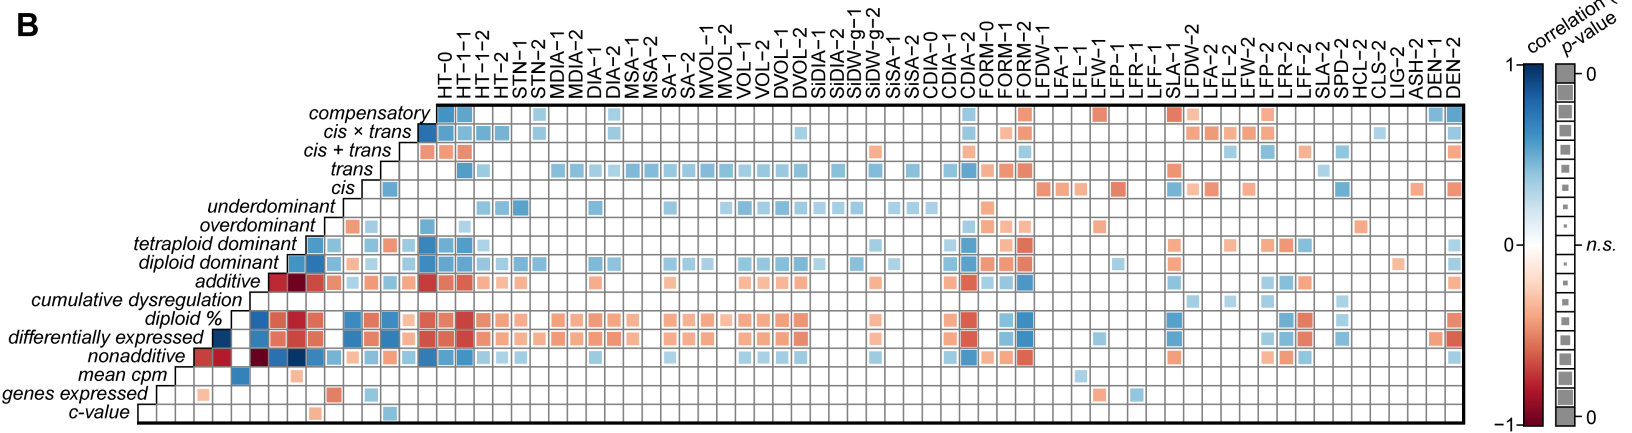

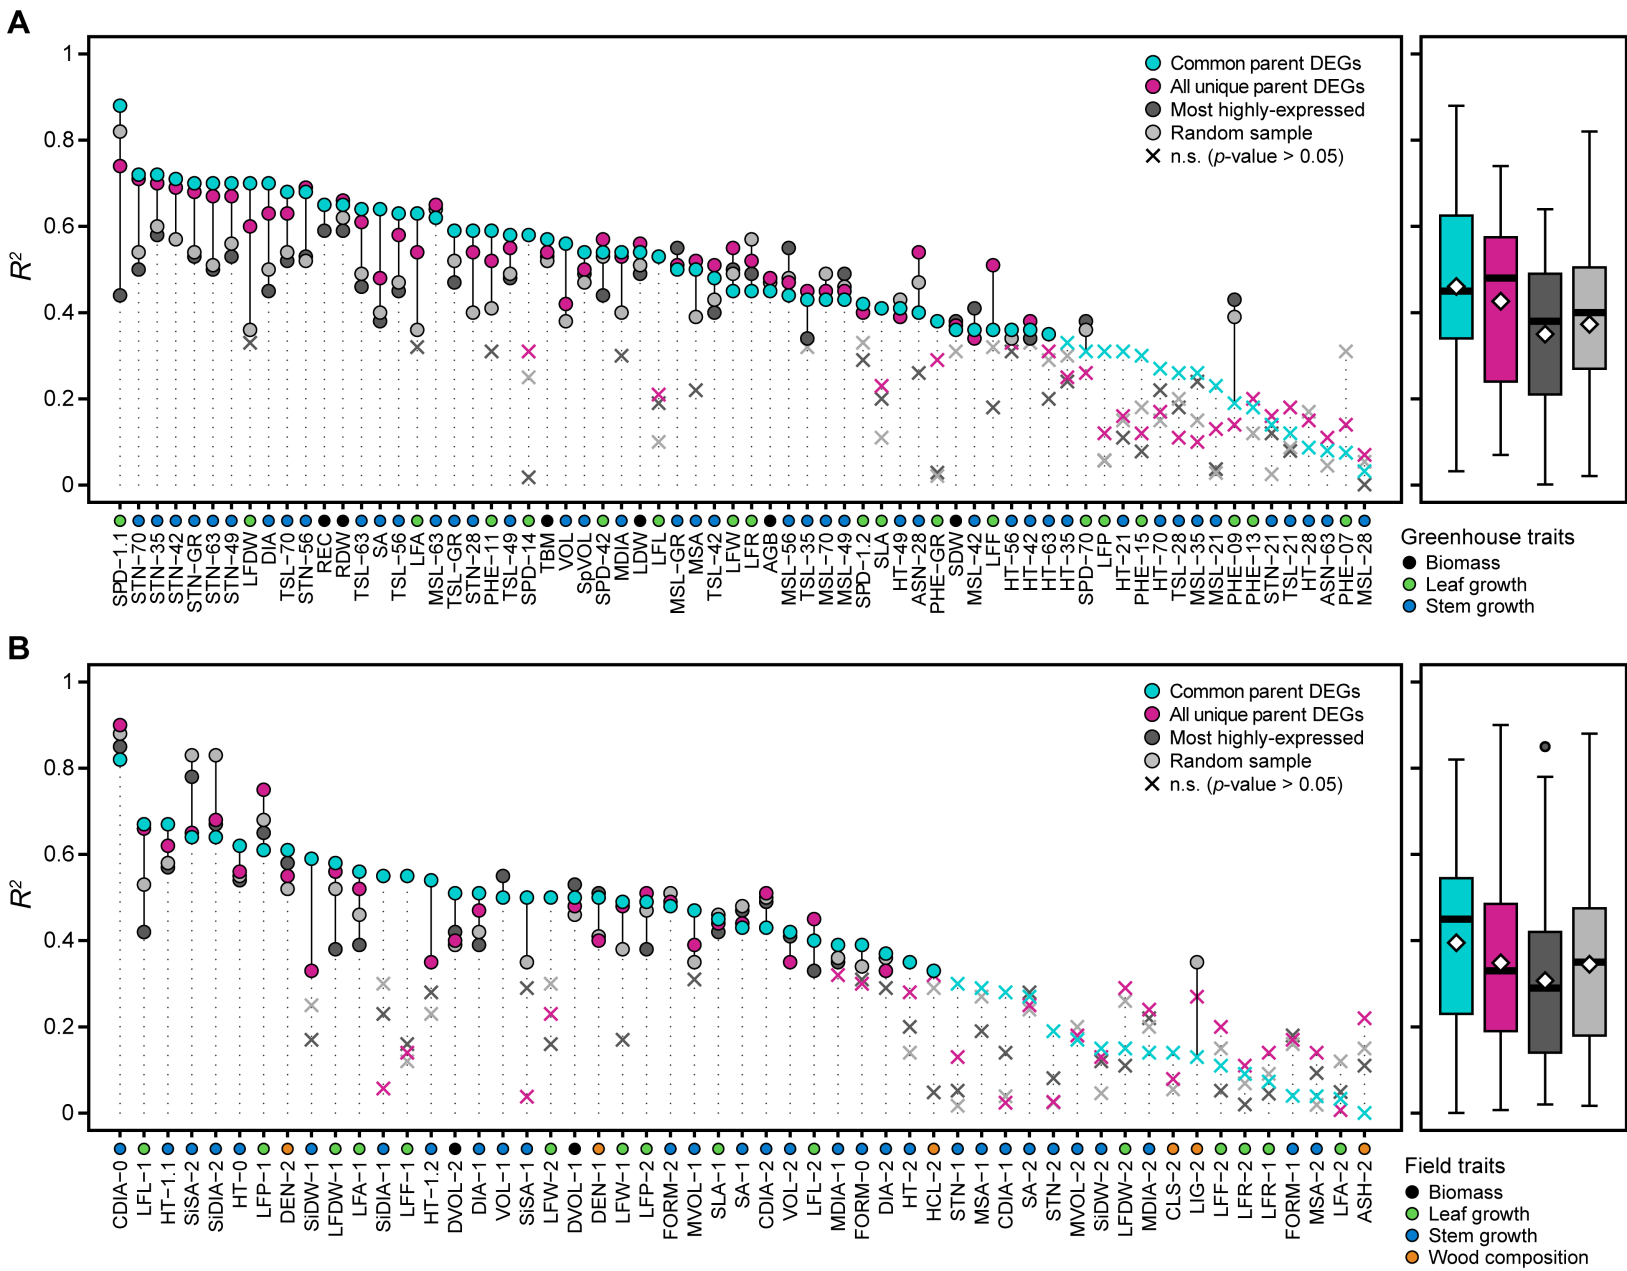

Source: http://biorxiv.org/content/10.1101/2021.10.13.464325v1.full.pdf
